# Supplementary material for: A chiral BINOL-bridged imidazole dimer possessing sub-millisecond fast photochromism
Source: Royal Society of Chemistry journal article supplement (doi:10.1039/c4cc02710h), 2014-01-01
Supplement: c4cc02710h1.pdf [file c4cc02710h1.pdf]

# Supporting Information

## Chiral BINOL-Bridged Imidazole Dimer Possessing Sub-Millisecond Fast Photochromism

Takahiro Iwasaki<sup>a</sup>, Tetsuya Kato<sup>a</sup>, Yoichi Kobayashi<sup>a</sup> and Jiro Abe<sup>\*ab</sup>

<sup>a</sup>*Department of Chemistry, School of Science and Engineering, Aoyama Gakuin University, 5-10-1 Fuchinobe, Chuo-ku, Sagami-hara, Kanagawa 252-5258, Japan*

<sup>b</sup>*CREST, Japan Science and Technology Agency (JST), K's Gobancho, 7 Gobancho, Chiyoda-ku, Tokyo 102-0076, Japan.*

*E-mail: jiro\_abe@chem.aoyama.ac.jp*

### Table of contents

|     |                                                                              |     |
|-----|------------------------------------------------------------------------------|-----|
| 1   | Synthesis.....                                                               | S2  |
| 1.1 | Synthesis of <b>1</b>                                                        |     |
| 1.2 | Synthesis of <b>2</b> (racemate)                                             |     |
| 1.3 | Synthesis of ( <i>S</i> )- <b>2</b>                                          |     |
| 2.  | HR-ESI-TOF-MS.....                                                           | S25 |
| 3   | HPLC analyses for determination of purity.....                               | S26 |
| 4   | Chiral HPLC analyses for determination of enantiomeric excesses (ee).....    | S27 |
| 5   | X-ray crystallographic analysis.....                                         | S28 |
| 6   | Laser flash photolysis.....                                                  | S30 |
| 7   | Eyring plot.....                                                             | S30 |
| 8   | CD spectroscopy.....                                                         | S32 |
| 9   | UV-vis absorption spectroscopy and investigation for fatigue resistance..... | S32 |
| 10  | DFT calculations.....                                                        | S34 |
| 11  | References.....                                                              | S72 |

## 1. Synthesis

All reactions were monitored by thin-layer chromatography carried out on 0.2 mm E. Merck silica gel plates (60F-254). Column chromatography was performed on the silica gel (Silica Gel 60N (spherical, neutral), 40-50  $\mu\text{m}$ , Kanto Chemical Co., Inc.).  $^1\text{H-NMR}$  spectra and  $^{13}\text{C-NMR}$  spectra were recorded on a Bruker AVANCE III 400 NanoBay.  $\text{DMSO-}d_6$ ,  $\text{CDCl}_3$  and  $\text{CD}_2\text{Cl}_2$  were used as deuterated solvent. MASS spectra (ESI-TOF-MS) were measured by using a Bruker micrOTOF II-AGA1. All reagents were purchased from Tokyo Chemical Industry Co., Ltd., Wako Pure Chemical Industries, Ltd., and Aldrich Chemical Company, Inc. and were used without further purification. All reaction solvents were distilled on the appropriate drying reagents prior to use.

### 1.1 Synthesis of 1

Scheme S1. Synthetic procedure of 1.

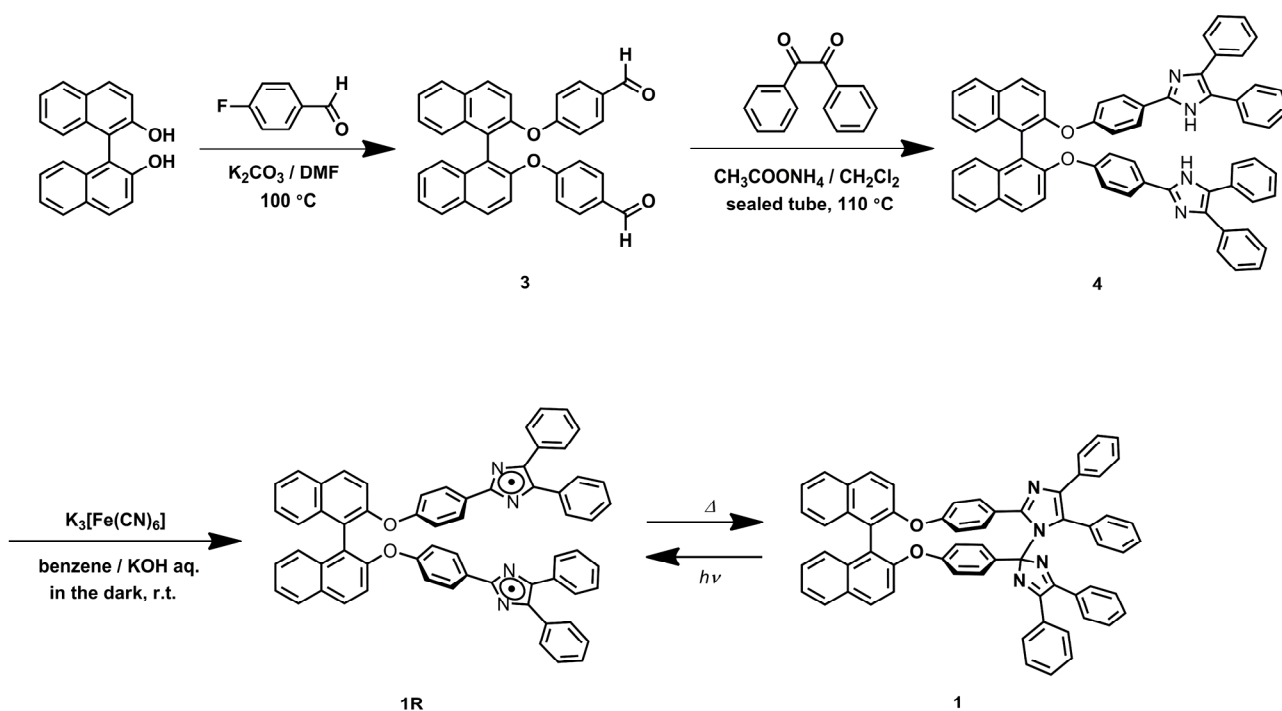

### Compound 3

1,1'-Bi-2-naphthol (2.00 g, 6.99 mmol), 4-fluorobenzaldehyde (1.80 mL, 17.1 mmol) and potassium carbonate (2.42 g, 17.5 mmol) were stirred at 100 °C in DMF (50 mL). After 42 h, the reaction mixture was cooled to room temperature and the target compound was extracted with CH<sub>2</sub>Cl<sub>2</sub>. The organic phase was washed with water, dried, and evaporated. The residue was purified by column chromatography over silica gel with CHCl<sub>3</sub> as eluent to give a light yellow solid (1.28 g, 2.58 mmol, yield; 37 %). <sup>1</sup>H NMR (400 MHz, DMSO-*d*<sub>6</sub>) : δ 9.79 (s, 2H), 8.13 (d, *J* = 9.0 Hz, 2H), 8.04 (d, *J* = 8.2 Hz, 2H), 7.69 (d, *J* = 8.6 Hz, 4H), 7.50 (t, *J* = 7.6, 9.0 Hz, 2H), 7.43-7.32 (m, 4H), 7.17 (d, *J* = 8.2 Hz, 2H), 6.92 (d, *J* = 8.6 Hz, 4H). HR-MS (ESI+) calculated for C<sub>34</sub>H<sub>23</sub>O<sub>4</sub> [M+H]<sup>+</sup> 495.1596, found 495.1614.

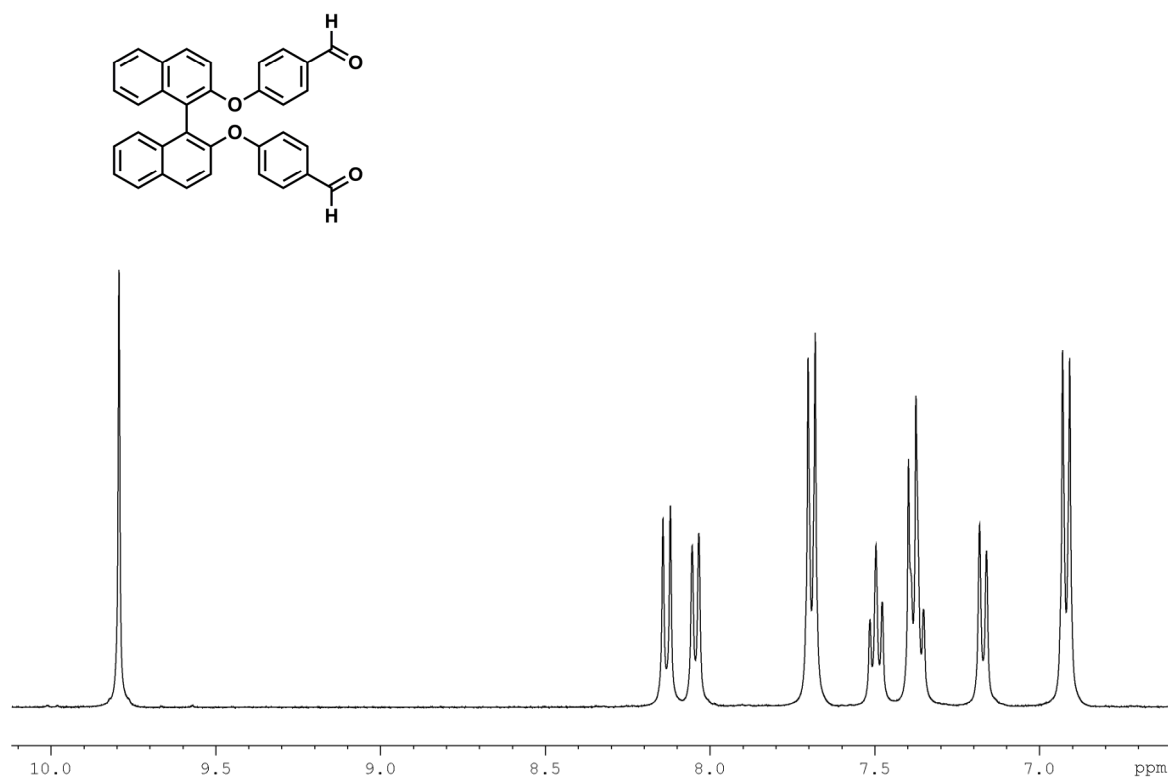

**Figure S1.** <sup>1</sup>H NMR spectrum of **3** in DMSO-*d*<sub>6</sub>.

#### Compound 4

Compound 3 (150 mg, 0.303 mmol), benzil (220 mg, 1.05 mmol), and ammonium acetate (350mg, 4.54 mmol) were stirred at 110 °C in CH<sub>2</sub>Cl<sub>2</sub> (1.0 mL) in a sealed tube. After 14 h, the reaction mixture was cooled to room temperature and washed with water, followed by ethanol. The precipitate was filtered and washed with hexane to give a white powder (194 mg, 0.222 mmol, yield; 73 %). <sup>1</sup>H NMR (400 MHz, DMSO-*d*<sub>6</sub>) δ: 12.50 (s, 2H), 8.11 (d, *J* = 8.7 Hz, 2H), 8.04 (d, *J* = 7.8, 2H), 7.94 (d, *J* = 7.8 Hz, 4H), 7.53 – 7.17 (m, 28H), 6.93 (d, *J* = 7.8 Hz, 4H); <sup>13</sup>C NMR (100 MHz, DMSO-*d*<sub>6</sub>) δ: 156.91, 151.59, 145.01, 136.88, 135.15, 133.48, 131.04, 130.21, 128.47, 128.25, 128.02, 127.86, 127.54, 126.97, 126.66, 126.34, 125.35, 125.06, 124.98, 121.65, 119.35, 118.15; HR-MS (ESI+) calculated for C<sub>62</sub>H<sub>43</sub>N<sub>4</sub>O<sub>2</sub> [M+H]<sup>+</sup> 875.3381, found 875.3297.

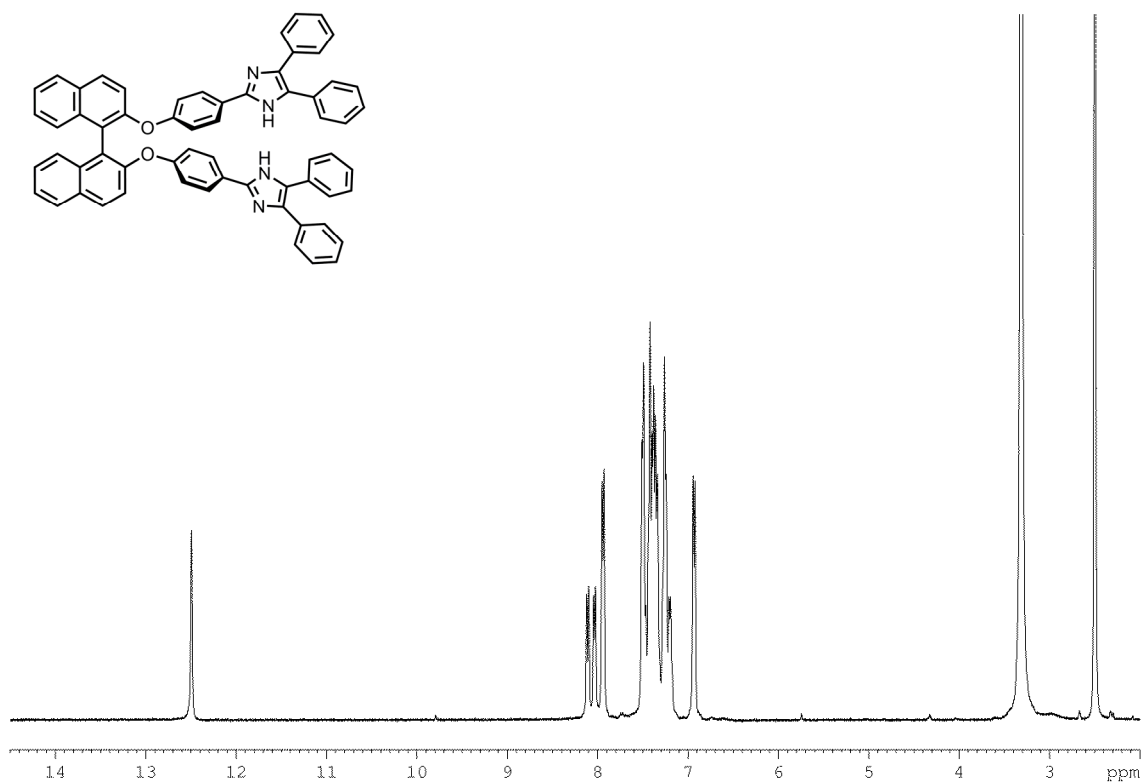

**Figure S2.** <sup>1</sup>H NMR spectrum of **4** in DMSO-*d*<sub>6</sub>.

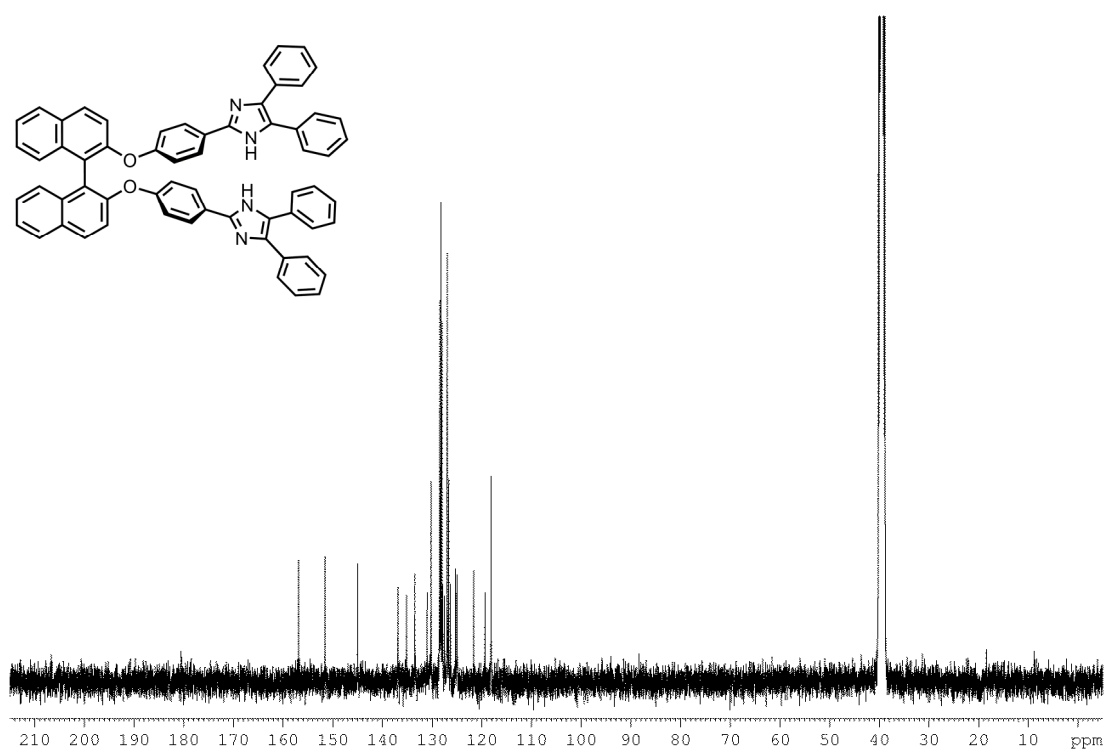

**Figure S3.** <sup>13</sup>C NMR spectrum of **4** in DMSO-*d*<sub>6</sub>.

## Compound 1

All manipulations were carried out with the exclusion of light. Under nitrogen, a solution of potassium ferricyanide (11.8 g, 35.8 mmol) and potassium hydroxide (4.05 g, 72.2 mmol) in water (200 mL) was added to a solution of compound **4** (629 mg, 0.718 mmol) in benzene (200 mL). The reaction mixture was vigorously stirred at room temperature for 2 h. The organic layer was washed with water, dried, and evaporated. The residue was purified by column chromatography over silica gel with AcOEt/hexane = 1/3 as eluent and followed by recrystallization from CHCl<sub>3</sub>/hexane to give a slightly green crystal of **3** (129 mg, 0.148 mmol, yield; 21 %). <sup>1</sup>H NMR (400 MHz, CD<sub>2</sub>Cl<sub>2</sub>) δ: 8.13 (d, *J* = 8.9 Hz, 1H), 8.06-7.95 (m, 3H), 7.66-7.02 (m, 32H), 6.93 (d, *J* = 8.8 Hz, 1H), 6.75 (d, *J* = 8.2 Hz, 1H), 6.61 (d, *J* = 8.7 Hz, 1H), 6.41 (d, *J* = 8.4 Hz, 1H), 6.06 (d, *J* = 8.5 Hz, 1H), 5.94 (d, *J* = 8.8 Hz, 1H); <sup>13</sup>C NMR (100 MHz, CD<sub>2</sub>Cl<sub>2</sub>) δ: 166.82, 166.34, 160.09, 158.96, 150.23, 149.92, 148.39, 138.14, 135.26, 135.23, 135.07, 134.75, 133.50, 133.39, 132.37, 132.34, 132.12, 131.89, 131.85, 131.36, 131.32, 131.27, 131.16, 130.77, 130.38, 130.24, 129.90, 129.83, 129.74, 128.92, 128.82, 128.70, 128.61, 128.46, 128.42, 128.27, 128.19, 128.04, 127.45, 127.33, 127.27, 126.53, 126.20, 126.13, 124.93, 124.34, 123.51, 122.47, 116.59, 115.81, 113.98, 113.17; HR-MS (ESI+) calculated for C<sub>62</sub>H<sub>41</sub>N<sub>4</sub>O<sub>2</sub> [M+H]<sup>+</sup> 873.3224, found 873.3113.

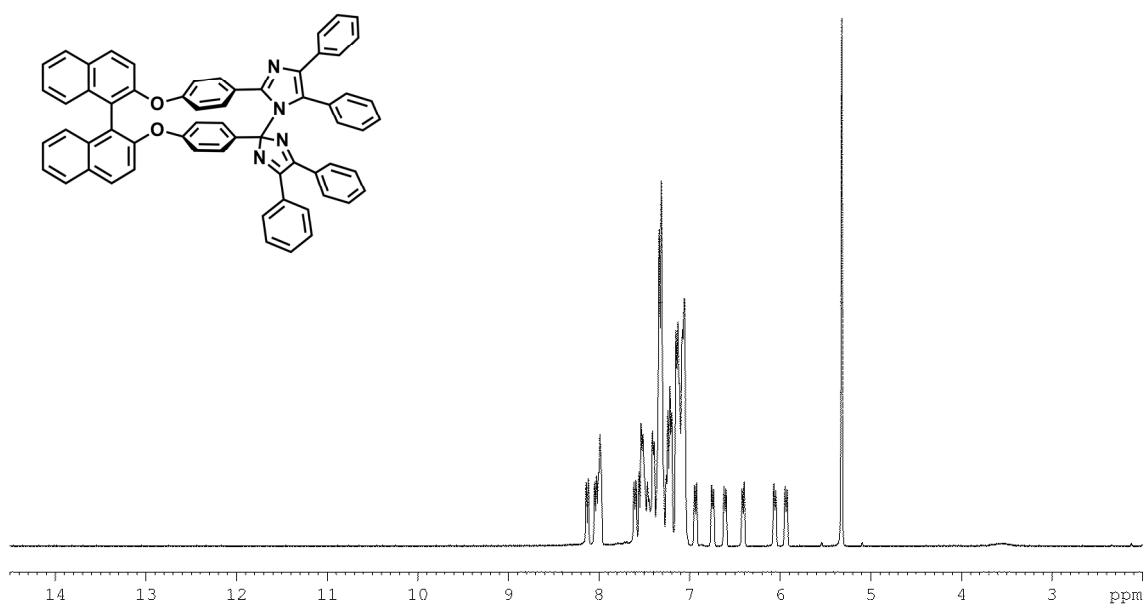

**Figure S4.**  $^1\text{H}$  NMR spectrum of **1** in  $\text{CD}_2\text{Cl}_2$ .

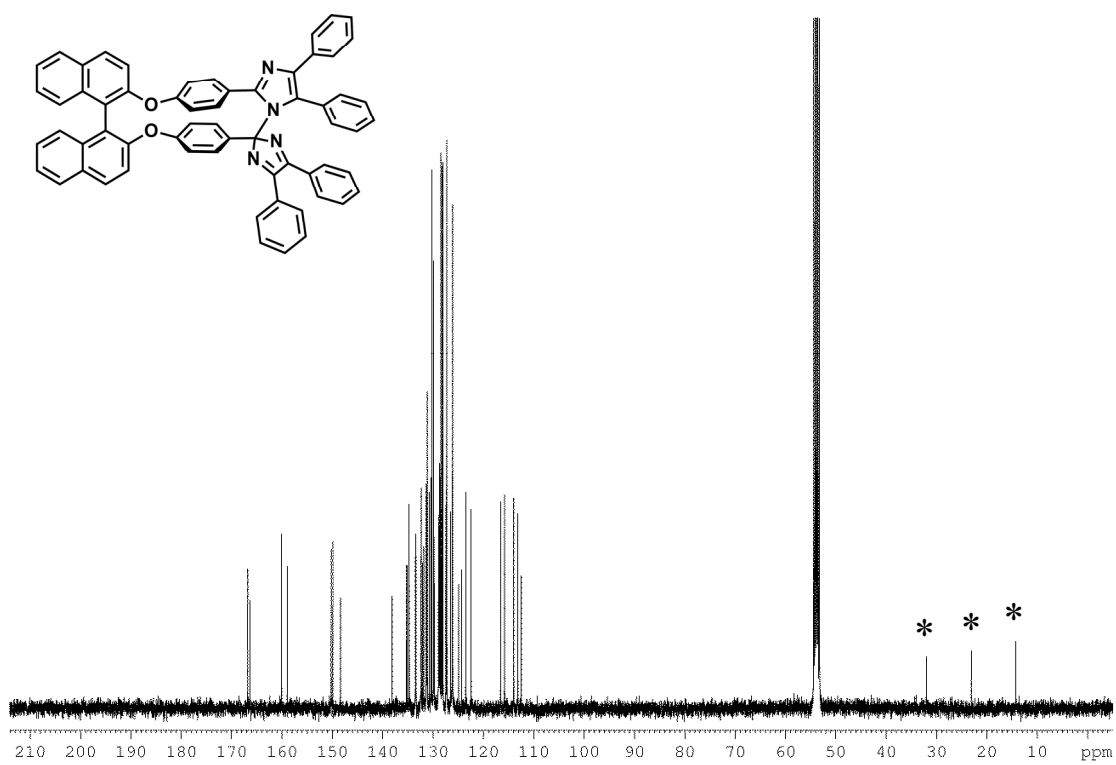

**Figure S5.**  $^{13}\text{C}$  NMR spectrum of **1** in  $\text{CD}_2\text{Cl}_2$  (\*Solvent Peaks).

## 1.2 Synthesis of 2 (racemate)

Scheme S2. Synthetic procedure of 2.

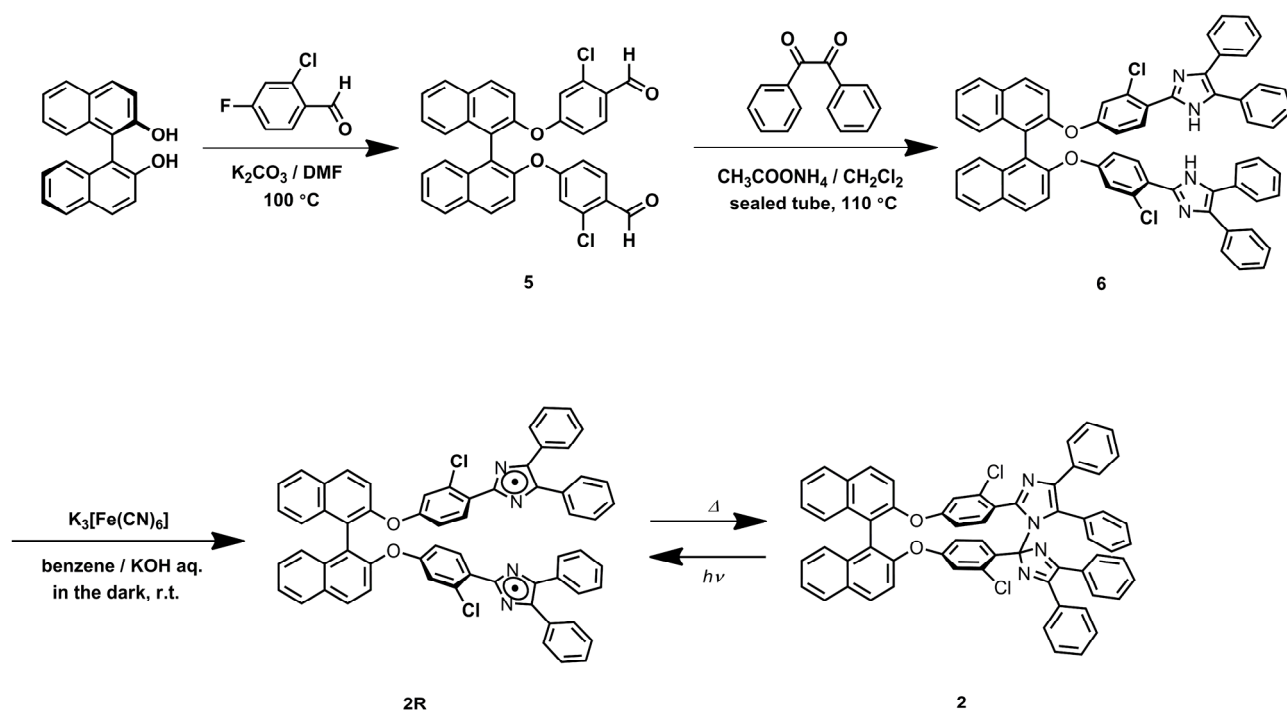



## Compound 5

(*R*)-1,1'-Bi-2-naphthol (2.00 g, 6.99 mmol), 2-chloro-4-fluorobenzaldehyde (2.66 g, 2.85 mmol) and potassium carbonate (2.51 g, 5.85 mmol) were stirred at 100 °C in DMF (50 mL). After 15 h, the reaction mixture was cooled to room temperature and the target compound was extracted with CH<sub>2</sub>Cl<sub>2</sub>. The organic phase was washed with water. The organic phase was dried over anhydrous sodium sulfate, filtered, and evaporated to give a yellow solid. The yellow solid was purified by column chromatography over silica gel with CH<sub>2</sub>Cl<sub>2</sub> as eluent to give a white amorphous solid (2.86 g, yield; 72 %). <sup>1</sup>H NMR (400 MHz, DMSO-*d*<sub>6</sub>) δ 8.19 (d, *J* = 9.2 Hz, 2H), 8.09 (d, *J* = 8.6 Hz, 2H), 7.61 (d, *J* = 8.6 Hz, 2H), 7.54 (dd, *J* = 7.3, 7.9 Hz, 2H), 7.48 (d, *J* = 9.2 Hz, 2H), 7.41 (dd, *J* = 8.6, 9.2 Hz, 2H), 7.12 (d, *J* = 8.6 Hz, 2H), 6.83 (dd, *J* = 9.2, 2.4 Hz, 2H), 6.77 (d, *J* = 2.4 Hz, 2H); HR-MS (ESI+) calculated for C<sub>34</sub>H<sub>21</sub>Cl<sub>2</sub>O<sub>4</sub> [M+H]<sup>+</sup> 563.0811, found 563.0819.

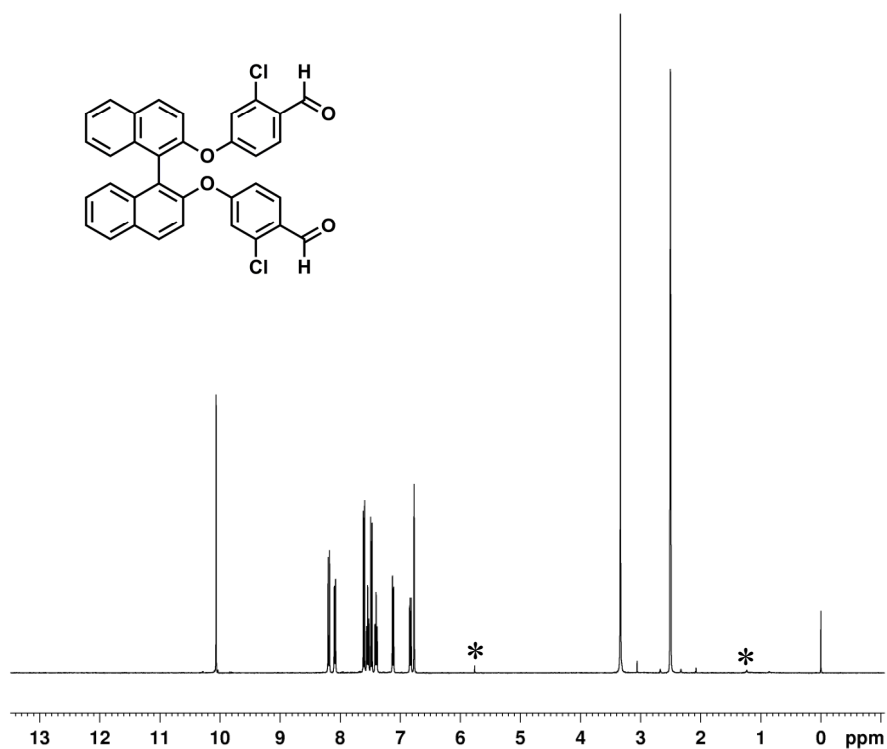

**Figure S6.** <sup>1</sup>H NMR spectrum of **5** in DMSO-*d*<sub>6</sub> (\*Solvent Peaks).

## Compound 6

Compound 5 (287 mg, 0.510 mmol), benzil (324 mg, 1.54 mmol) and ammonium acetate (599 mg, 7.77 mmol) were stirred at 110 °C in CH<sub>2</sub>Cl<sub>2</sub> (1.7 mL) in a sealed tube. After 2 days, the reaction mixture was cooled to room temperature and washed with water, followed by ethanol. The precipitate was filtered and washed with hexane to give a white powder (374 mg, 0.267 mmol, yield; 77.8 %). <sup>1</sup>H NMR (400 MHz, DMSO-*d*<sub>6</sub>) δ 12.5 (s, 2H), 8.18 (d, *J* = 9.2 Hz, 2H), 8.08 (d, *J* = 7.9 Hz, 2H), 7.69 (d, *J* = 8.6 Hz, 2H), 7.54–7.19 (m, 28H), 7.05 (d, *J* = 2.4 Hz, 2H), 6.98 (dd, *J* = 9.2, 2.4 Hz, 2H); HR-MS (ESI+) calculated for C<sub>62</sub>H<sub>41</sub>Cl<sub>2</sub>N<sub>4</sub>O<sub>2</sub> [M+H]<sup>+</sup> 943.2601, found 943.2634.

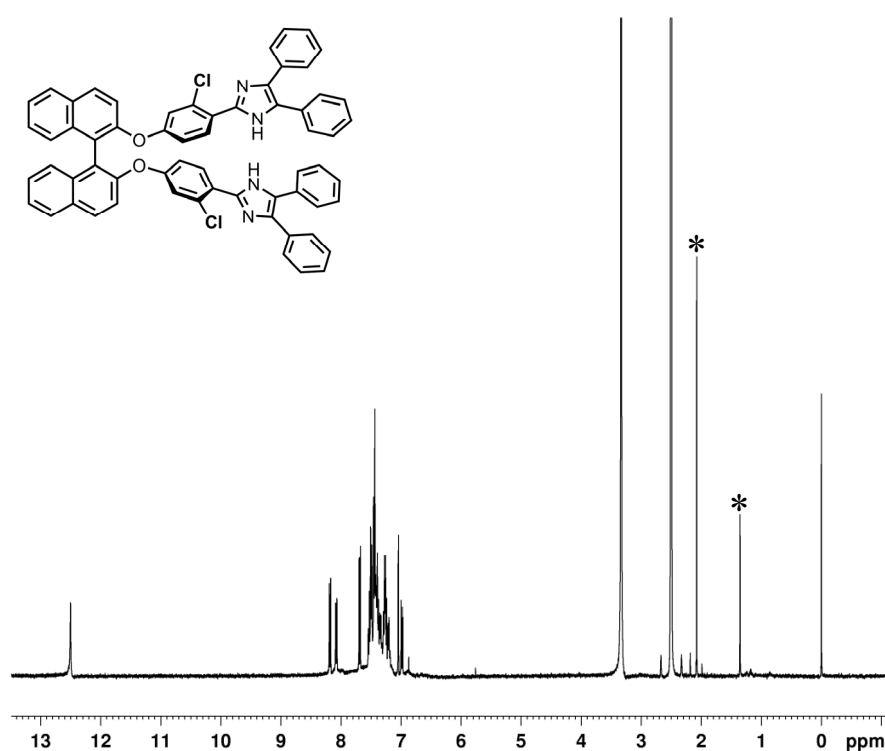

**Figure S7.** <sup>1</sup>H NMR spectrum of **6** in DMSO-*d*<sub>6</sub> (\*Solvent Peaks).

## Compound 2

All manipulations were carried out with the exclusion of light. Under nitrogen, a solution of potassium ferricyanide (5.91 g, 18.0 mmol) and potassium hydroxide (2.05 g, 36.6 mmol) in water (125 mL) was added to a solution of compound **6** (344 mg, 0.363 mmol) in benzene (125 mL). The reaction mixture was vigorously stirred at room temperature for 3 h. The organic layer was washed with water, dried, and evaporated. The residue was purified by column chromatography over silica gel with AcOEt/hexane = 1/3 as eluent to give a yellow solid (209 mg, yield; 61 %). The obtained compound was the racemate as was shown in Figure S27 because the refluxes at >100 °C racemize the (*R*)-1,1'-bi-2-naphthol moiety. <sup>1</sup>H NMR (400 MHz, DMSO-*d*<sub>6</sub>) δ 8.30 (d, *J* = 9.2 Hz, 1H), 8.18 (m, 3H), 7.63–6.85 (m, 32H), 6.09 (dd, *J* = 9.2, 2.4 Hz, 2H), 5.97 (dd, *J* = 9.2, 2.4 Hz, 2H); HR-MS (ESI+) calculated for C<sub>62</sub>H<sub>39</sub>Cl<sub>2</sub>N<sub>4</sub>O<sub>2</sub> [M+H]<sup>+</sup> 941.2445, found 941.2478.

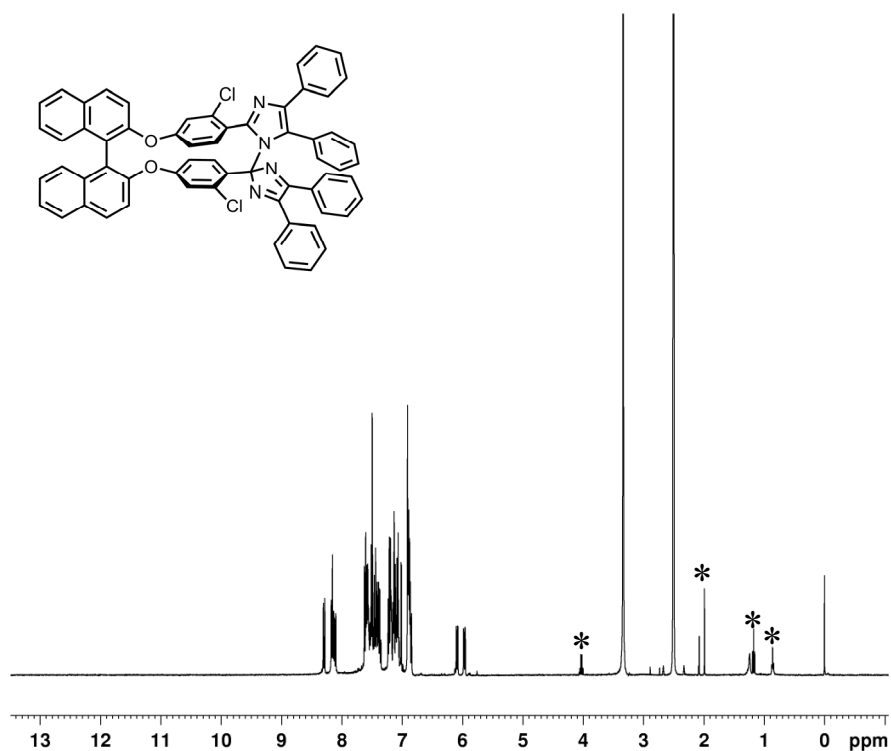

**Figure S8.** <sup>1</sup>H NMR spectrum of **2** in DMSO-*d*<sub>6</sub> (\*Solvent Peaks).

### 1.3 Synthesis of (S)-2

**Scheme S3.** Synthetic procedure of (S)-2 (the synthesis of (R)-2 was the identical to that of (S)-2 except that (R)-1,1'-bi-2-naphthol was used as the starting material).

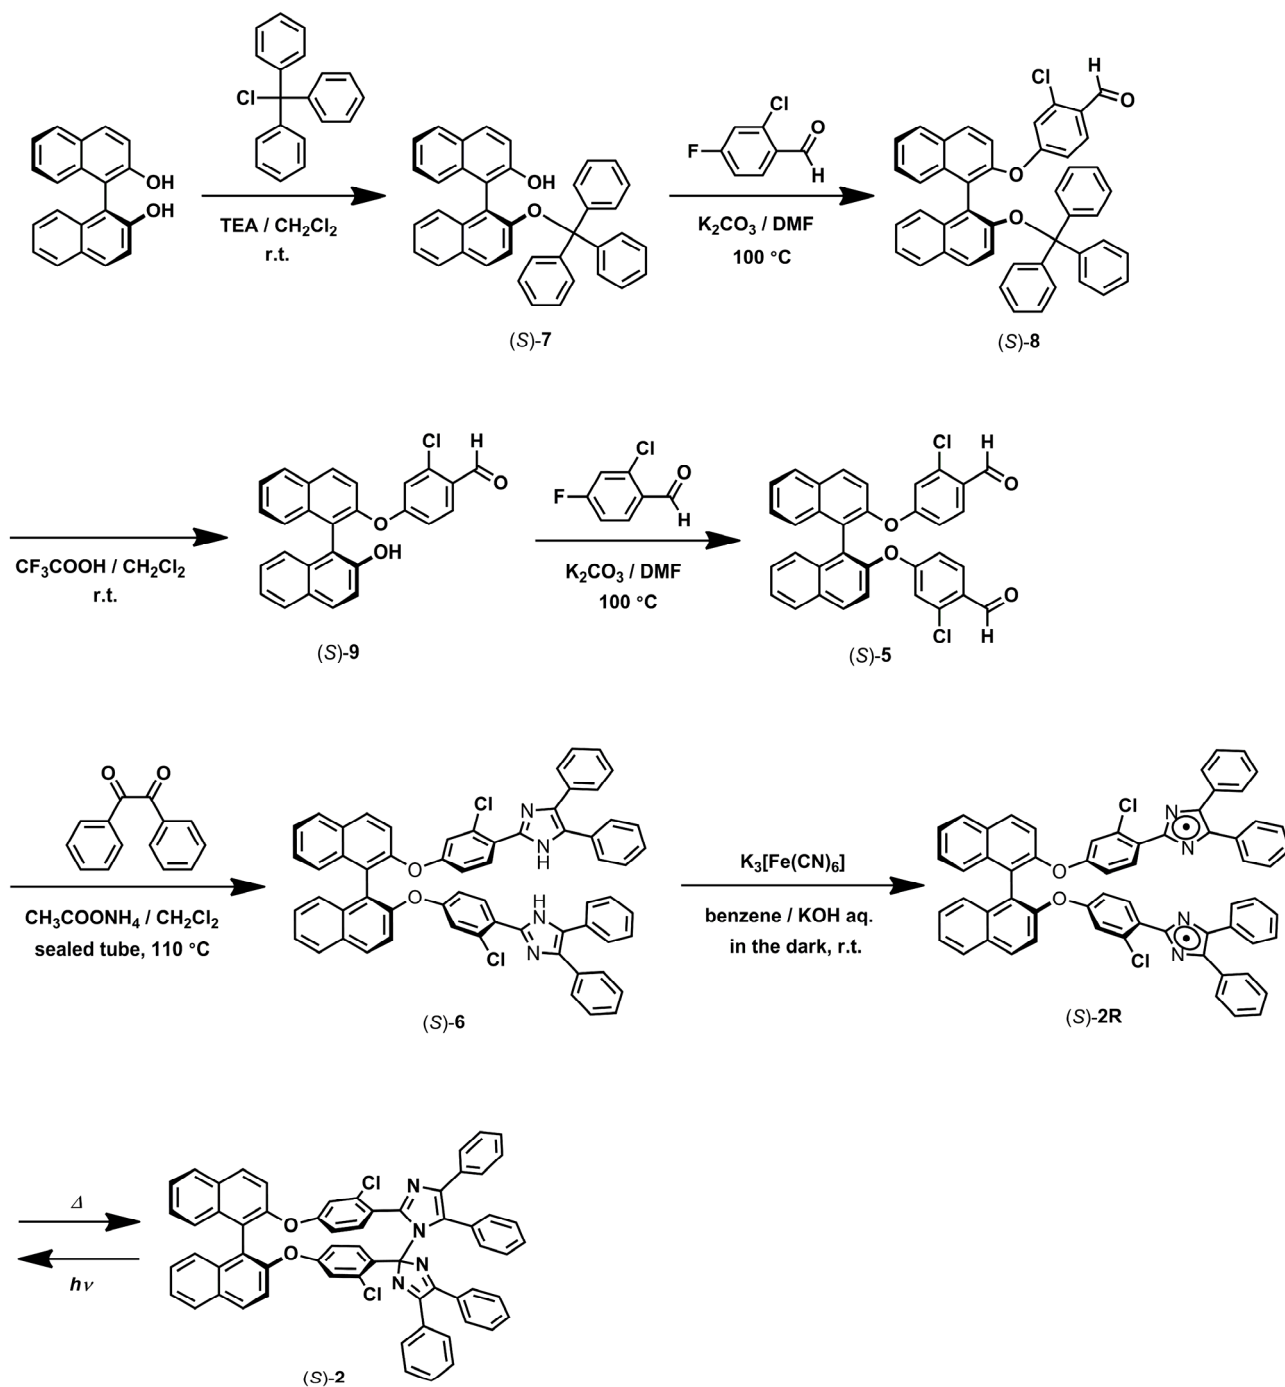

### Compound (S)-7

Trityl chloride (3.89 g 13.9 mmol) in CH<sub>2</sub>Cl<sub>2</sub> (45 mL) were added to (S)-1,1-bi-2-naphthol (4.00 g, 13.9 mmol), triethylamine (2.32 mL, 16.7 mmol) and CH<sub>2</sub>Cl<sub>2</sub> (45 mL) at 0 °C. The mixture was allowed to warm to room temperature and was stirred for 2 h. The reaction mixture was washed with water. The organic phase was dried over anhydrous sodium sulfate, and the solution was filtered. The evaporation of the solvent afforded a yellow solid and the recrystallization from CH<sub>2</sub>Cl<sub>2</sub>/hexane gives a white crystal of compound (S)-7 (5.08 g, yield; 68.7 %). <sup>1</sup>H NMR (400 MHz, DMSO-*d*<sub>6</sub>) δ 9.56 (s, 1H), 7.94 (d, *J* = 8.9 Hz, 1H), 7.89 (dd, *J* = 6.3, 2.4 Hz, 1H), 7.74 (d, *J* = 8.0 Hz, 1H), 7.49 (d, *J* = 9.2 Hz, 1H), 7.43 (d, *J* = 8.9 Hz, 1H), 7.29–7.13 (m, 19H), 7.06 (d, *J* = 8.3 Hz, 1H), 6.86 (dd, *J* = 6.3, 2.4 Hz, 1H), 6.73 (d, *J* = 8.9 Hz, 1H); <sup>13</sup>C NMR (100 MHz, CDCl<sub>3</sub>) δ 152.99, 151.16, 146.90, 143.99, 134.07, 133.82, 131.49, 129.64, 129.30, 129.23, 128.77, 128.39, 128.07, 127.99, 127.98, 127.73, 127.54, 127.31, 127.12, 126.97, 126.34, 125.32, 125.08, 124.40, 124.26, 124.09, 118.64, 117.82, 117.51, 115.89, 90.11; HR-MS (ESI<sup>-</sup>) calculated for C<sub>39</sub>H<sub>27</sub>O<sub>2</sub> [M-H]<sup>-</sup> 527.2011, found 527.2013.

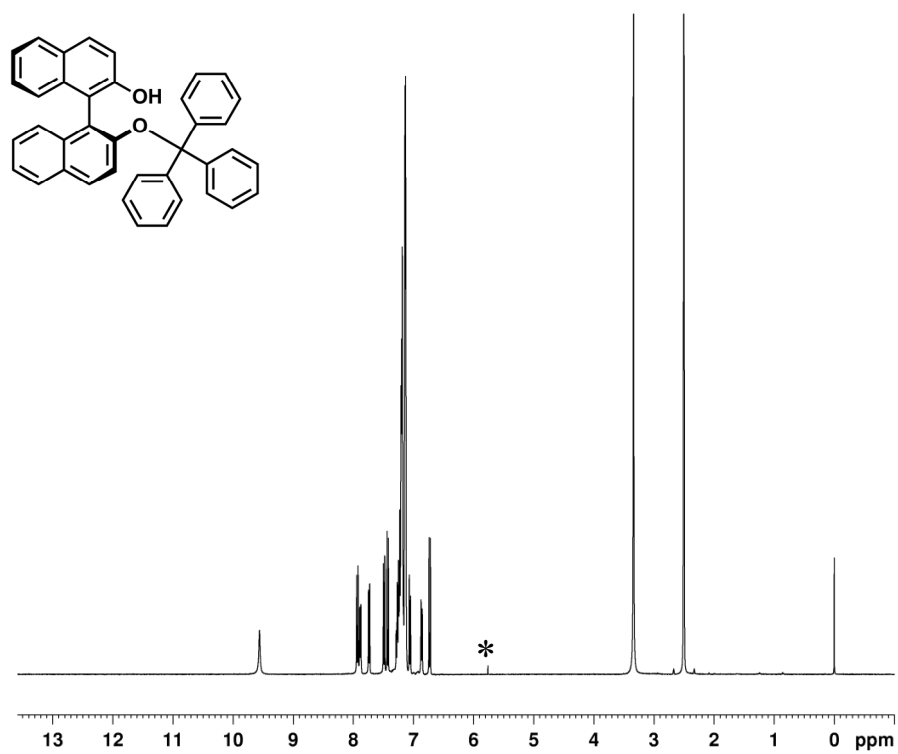

**Figure S9.** <sup>1</sup>H NMR spectrum of (*S*)-7 in DMSO-*d*<sub>6</sub> (\*Solvent Peak).

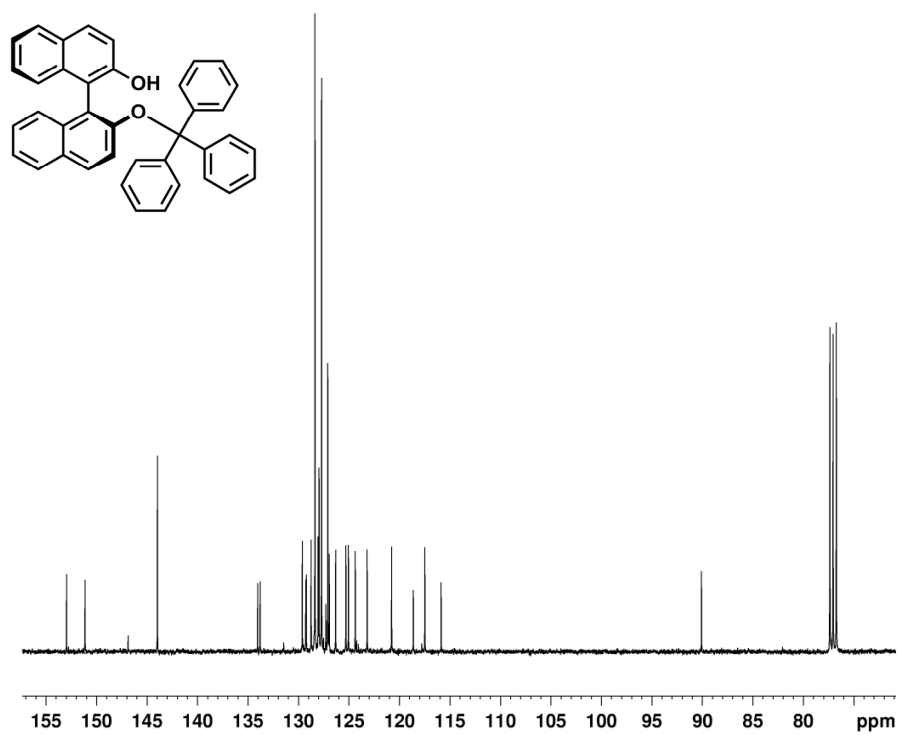

**Figure S10.** <sup>13</sup>C NMR spectrum of (*S*)-7 in CDCl<sub>3</sub>.

### Compound (S)-8

Compound (S)-7 (2.00 g, 3.78 mmol), 2-chloro-4-fluorobenzaldehyde (780 mg, 4.92 mmol) and potassium carbonate (1.36 g, 9.84 mmol) were stirred at 100 °C in DMF (50 mL). After 23 h, the reaction mixture was cooled to room temperature and the target compound was extracted with AcOEt. The organic phase was washed with water. The organic phase was dried over anhydrous sodium sulfate, filtered, and evaporated to give a yellow oil solid. The yellow oil solid was purified by column chromatography over silica gel with CH<sub>2</sub>Cl<sub>2</sub>/hexane as eluent to give a white amorphous solid (1.54 g, yield; 61.1 %). <sup>1</sup>H NMR (400 MHz, DMSO-*d*<sub>6</sub>) δ 10.08 (s, 1H), 8.28 (d, *J* = 9.0 Hz, 1H), 8.15 (d, *J* = 8.1 Hz, 1H), 7.70 (dd, *J* = 7.0, 1.4 Hz, 1H), 7.65–7.42 (m, 5H), 7.34–7.08 (m, 23H), 6.94 (d, *J* = 2.3 Hz, 1H), 6.89 (dd, *J* = 8.6, 2.2 Hz, 1H), 6.71 (d, *J* = 9.2 Hz, 1H); <sup>13</sup>C NMR (100 MHz, CDCl<sub>3</sub>) δ 188.47, 163.06, 151.93, 150.12, 144.07, 139.28, 134.29, 133.56, 131.58, 130.74, 129.79, 128.42, 128.10, 127.96, 127.88, 127.81, 126.80, 126.77, 126.51, 126.16, 126.05, 125.68, 124.93, 123.61, 120.29, 119.70, 119.32, 118.65, 116.11, 89.64, 53.46; HR-MS (ESI+) calculated for C<sub>46</sub>H<sub>31</sub>ClNaO<sub>3</sub> [M+Na]<sup>+</sup> 689.1859, found 689.1841.

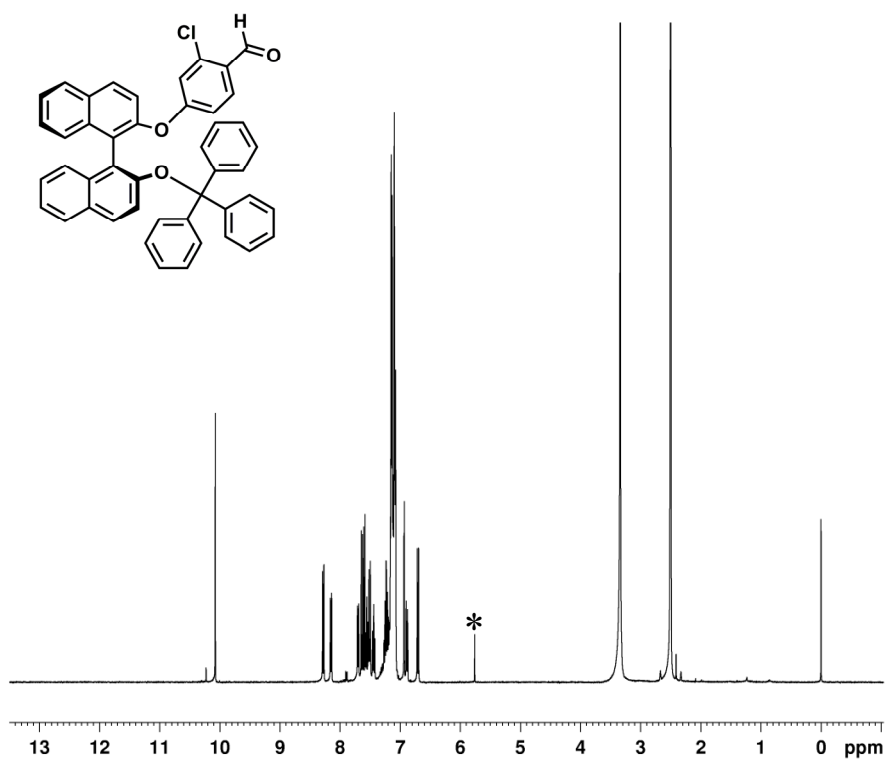

**Figure S11.** <sup>1</sup>H NMR spectrum of (*S*)-**8** in DMSO-*d*<sub>6</sub> (\*Solvent Peak).

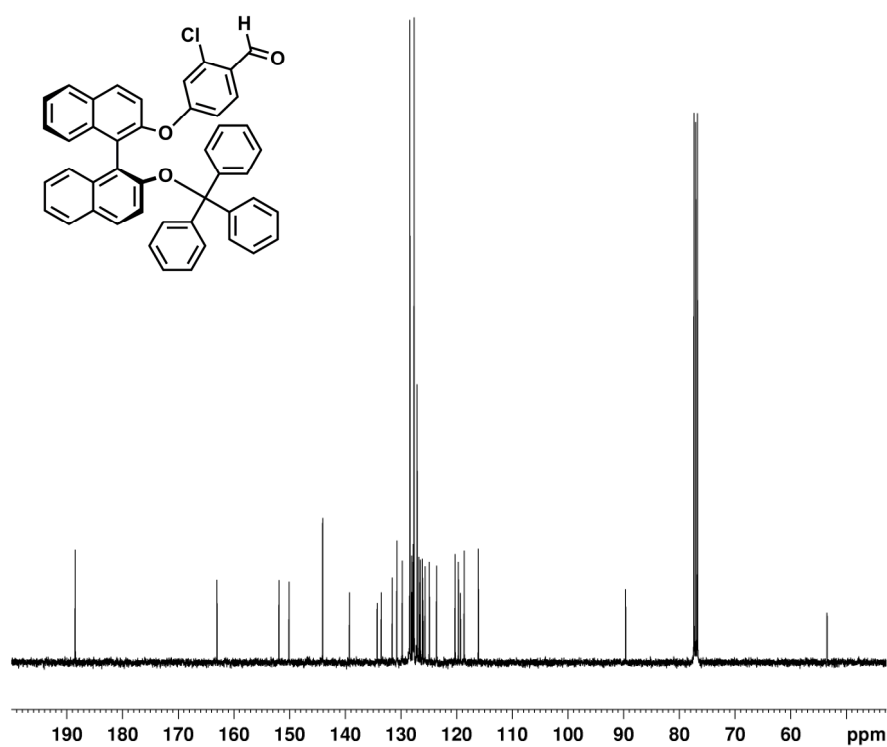

**Figure S12.** <sup>13</sup>C NMR spectrum of (*S*)-**8** in CDCl<sub>3</sub>.



### Compound (S)-9

TFA (9.70 mL) was added to compound (S)-8 (1.08 g, 1.62 mmol) in CH<sub>2</sub>Cl<sub>2</sub> (200 mL) at 0 °C. The mixture was allowed to warm to room temperature and was stirred for 2 h, quenched with NaHCO<sub>3</sub> aqueous. The organic phase was washed with water, dried over anhydrous sodium sulfate, filtered, and evaporated to give a brown oil solid. The brown oil solid was purified by column chromatography over silica gel with CH<sub>2</sub>Cl<sub>2</sub>/hexane as eluent to give a white amorphous solid (544 mg, yield; 79.2 %). <sup>1</sup>H NMR (400 MHz, DMSO-*d*<sub>6</sub>) δ 10.13 (s, 1H), 9.61 (s, 1H), 8.17 (d, *J* = 8.9 Hz, 1H), 8.09 (d, *J* = 8.2 Hz, 1H), 7.84–7.82 (m, 2H), 7.69 (d, *J* = 8.7 Hz, 1H), 7.55–7.52 (m, 1H), 7.47 (d, *J* = 8.9 Hz, 1H), 7.41–7.37 (m, 1H), 7.32–7.19 (m, 3H), 7.15 (d, *J* = 8.4 Hz, 1H), 6.97–6.91 (m, 3H); <sup>13</sup>C NMR (100 MHz, DMSO-*d*<sub>6</sub>) δ 188.24, 162.70, 153.04, 150.01, 137.58, 133.60, 133.54, 131.24, 131.18, 130.21, 129.60, 128.27, 127.98, 127.73, 127.49, 126.88, 126.60, 125.55, 125.04, 123.87, 122.53, 120.67, 118.29, 118.11, 116.54, 112.98; HR-MS (ESI<sup>-</sup>) calculated for C<sub>27</sub>H<sub>16</sub>ClO<sub>3</sub> [M-H]<sup>-</sup> 423.0788, found 423.0790.

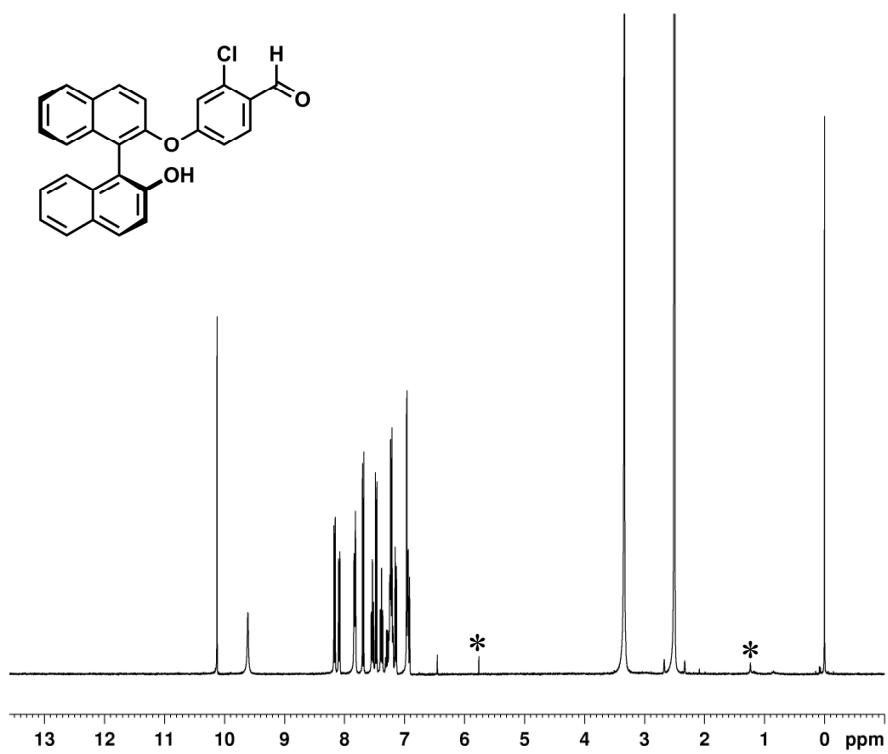

**Figure S13.** <sup>1</sup>H NMR spectrum of (*S*)-**9** in DMSO-*d*<sub>6</sub> (\*Solvent Peaks).

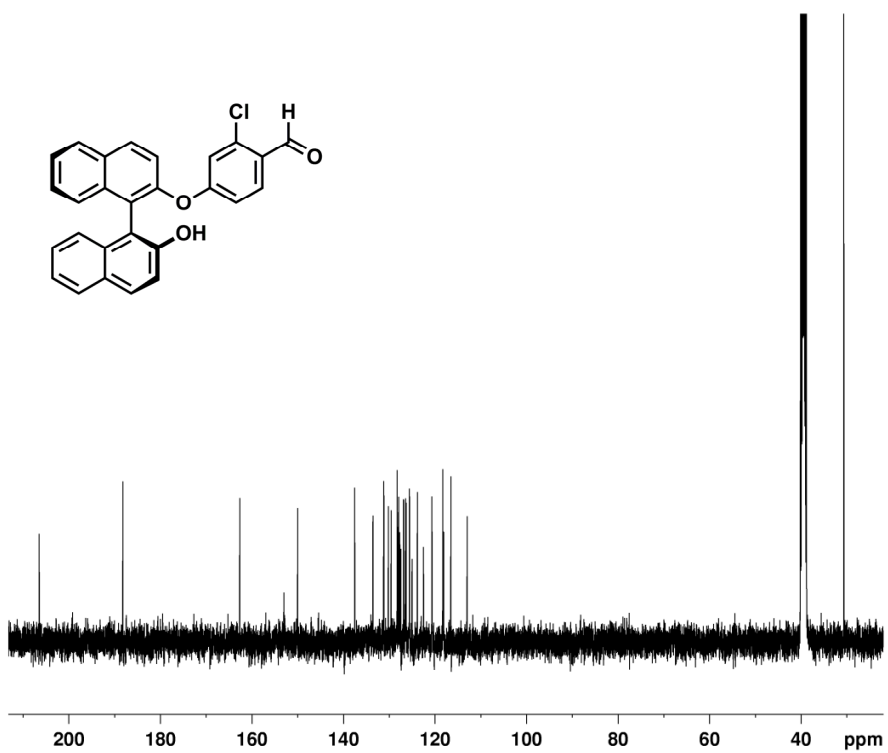

**Figure S14.** <sup>13</sup>C NMR spectrum of (*S*)-**9** in DMSO-*d*<sub>6</sub>.

### Compound (S)-5

Compound (S)-9 (807 mg, 1.90 mmol), 2-chloro-4-fluorobenzaldehyde (456 mg, 2.85 mmol) and potassium carbonate (808 mg, 5.85 mmol) were stirred at 100 °C in DMF (50 mL). After 18 h, the reaction mixture was cooled to room temperature and the target compound was extracted with AcOEt. The organic phase was washed with water. The organic phase was dried over anhydrous sodium sulfate, filtered, and evaporated to give a yellow solid. The yellow solid was purified by column chromatography over silica gel with CH<sub>2</sub>Cl<sub>2</sub>/hexane as eluent to give a white amorphous solid (855 mg, yield; 79.9 %). <sup>1</sup>H NMR (400 MHz, DMSO-*d*<sub>6</sub>) δ 8.19 (d, *J* = 9.2 Hz, 2H), 8.09 (d, *J* = 8.6 Hz, 2H), 7.61 (d, *J* = 8.6 Hz, 2H), 7.54 (dd, *J* = 7.3, 7.9 Hz, 2H), 7.48 (d, *J* = 9.2 Hz, 2H), 7.41 (dd, *J* = 8.6, 9.2 Hz, 2H), 7.12 (d, *J* = 8.6 Hz, 2H), 6.83 (dd, *J* = 9.2, 2.4 Hz, 2H), 6.77 (d, *J* = 2.4 Hz, 2H); <sup>13</sup>C NMR (100 MHz, DMSO-*d*<sub>6</sub>) δ 188.23, 162.70, 153.03, 150.01, 147.73, 137.58, 133.60, 133.54, 131.24, 131.18, 130.21, 129.59, 128.27, 127.97, 127.71, 127.48, 126.88, 126.60, 126.47, 126.32, 125.59, 125.55, 125.04, 123.87, 122.53, 120.67, 118.29, 118.10, 116.54, 112.98; HR-MS (ESI+) calculated for C<sub>34</sub>H<sub>21</sub>Cl<sub>2</sub>O<sub>4</sub> [M+H]<sup>+</sup> 563.0811, found 563.0796.

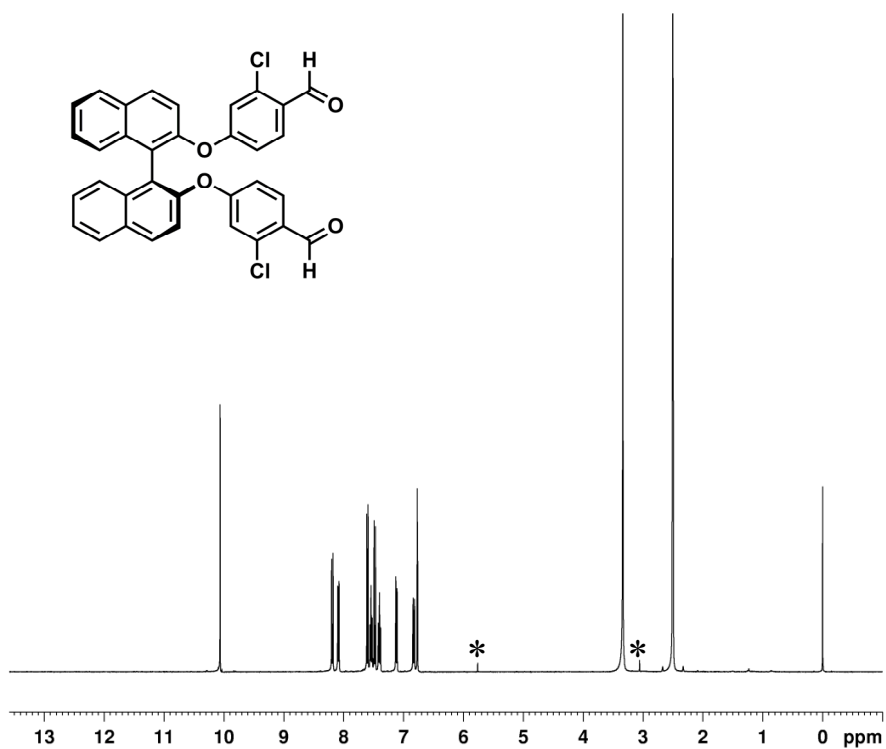

**Figure S15.**  $^1\text{H}$  NMR spectrum of (*S*)-**5** in  $\text{DMSO-}d_6$  (\*Solvent Peaks).

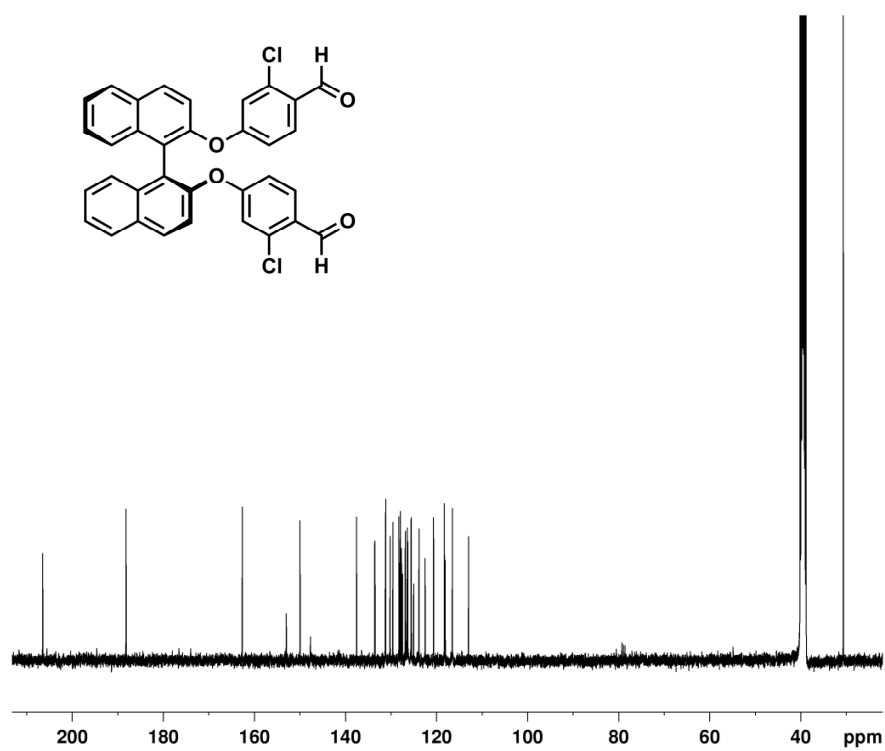

**Figure S16.**  $^{13}\text{C}$  NMR spectrum of (*S*)-**5** in  $\text{DMSO-}d_6$ .

### Compound (S)-6

Compound (S)-5 (287 mg, 0.510 mmol), benzil (324 mg, 1.54 mmol) and ammonium acetate (599 mg, 7.77 mmol) were stirred at 110 °C in CH<sub>2</sub>Cl<sub>2</sub> (1.7 mL) in a sealed tube. After 2 days, the reaction mixture was cooled to room temperature and washed with water, followed by ethanol. The precipitate was filtered and washed with hexane to give a white powder (374 mg, 0.267 mmol, yield; 77.8 %). <sup>1</sup>H NMR (400 MHz, DMSO-*d*<sub>6</sub>) δ 12.5 (s, 2H), 8.18 (d, *J* = 9.2 Hz, 2H), 8.08 (d, *J* = 7.9 Hz, 2H), 7.69 (d, *J* = 8.6 Hz, 2H), 7.54–7.19 (m, 28H), 7.05 (d, *J* = 2.4 Hz, 2H), 6.98 (dd, *J* = 9.2, 2.4 Hz, 2H); <sup>13</sup>C NMR (100 MHz, CDCl<sub>3</sub>) δ 158.03, 150.80, 142.92, 137.56, 134.56, 134.12, 131.62, 130.96, 130.76, 130.37, 129.97, 128.90, 128.28, 128.24, 127.81, 127.72, 127.55, 127.21, 127.05, 126.95, 125.79, 125.42, 122.73, 122.28, 119.69, 118.83, 117.41; HR-MS (ESI+) calculated for C<sub>62</sub>H<sub>41</sub>Cl<sub>2</sub>N<sub>4</sub>O<sub>2</sub> [M+H]<sup>+</sup> 943.2601, found 943.2604.

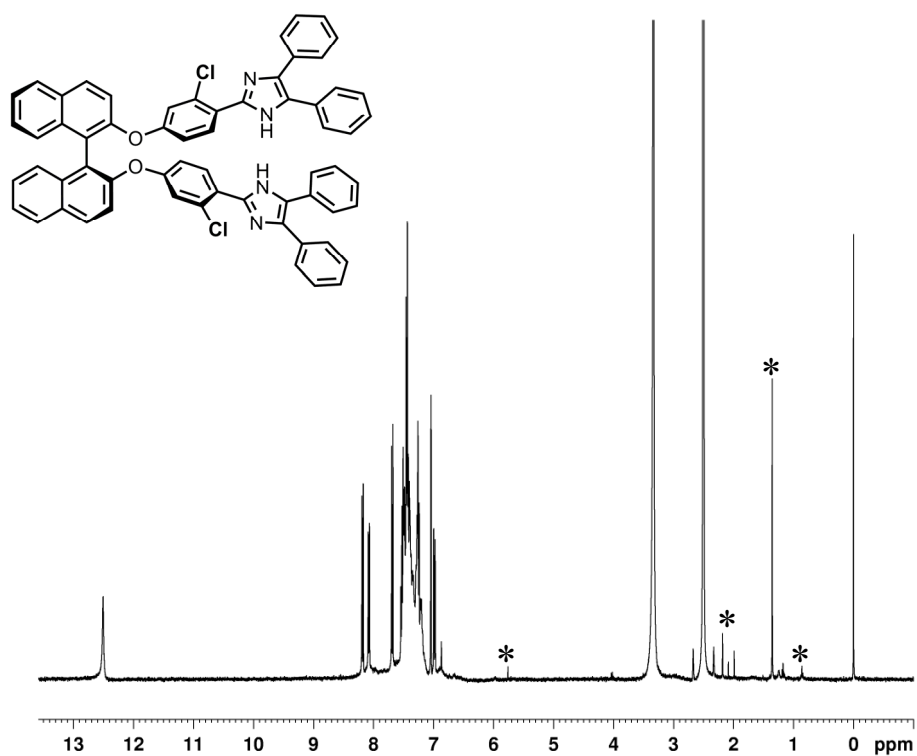

**Figure S17.** <sup>1</sup>H NMR spectrum of (*S*)-**6** in DMSO-*d*<sub>6</sub> (\*Solvent Peaks).

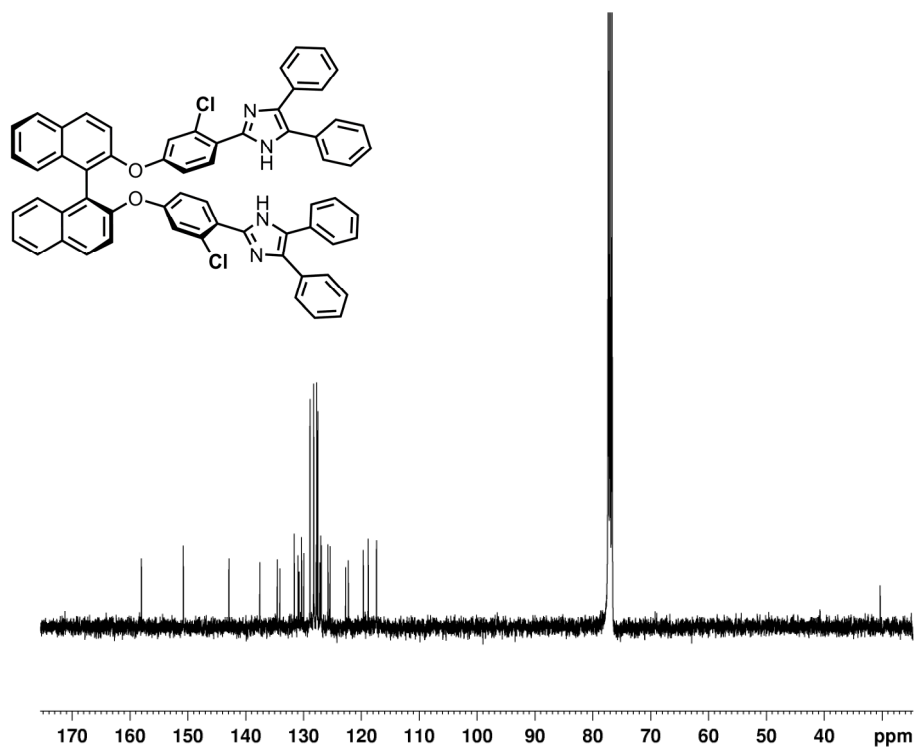

**Figure S18.** <sup>13</sup>C NMR spectrum of (*S*)-**6** in CDCl<sub>3</sub>.

## Compound (S)-2

All manipulations were carried out with the exclusion of light. Under nitrogen, a solution of potassium ferricyanide (3.78 g, 11.5 mmol) and potassium hydroxide (1.36 g, 24.2 mmol) in water (60 mL) was added to a solution of compound (S)-6 (202 mg, 0.214 mmol) in benzene (60 mL). The reaction mixture was vigorously stirred at room temperature for 3 h. The organic layer was washed with water, dried, and evaporated. The residue was purified by column chromatography over silica gel with AcOEt/hexane = 1/3 as eluent to give a yellow solid (61.0 mg, yield; 30 %).  $^1\text{H}$  NMR (400 MHz, DMSO- $d_6$ )  $\delta$  8.30 (d,  $J$  = 9.2 Hz, 1H), 8.18 (m, 3H), 7.63–6.85 (m, 32H), 6.09 (dd,  $J$  = 9.2, 2.4 Hz, 2H), 5.97 (dd,  $J$  = 9.2, 2.4 Hz, 2H);  $^{13}\text{C}$  NMR (100 MHz,  $\text{CDCl}_3$ )  $\delta$  167.35, 165.01, 160.36, 160.15, 149.42, 149.42, 149.05, 144.95, 137.44, 136.34, 135.61, 134.87, 134.80, 134.28, 133.20, 133.05, 132.96, 131.78, 131.62, 131.51, 131.38, 131.03, 130.84, 130.64, 130.51, 130.27, 130.06, 129.94, 129.35, 128.97, 128.48, 128.31, 128.20, 128.16, 128.07, 127.71, 127.31, 127.20, 127.10, 126.88, 126.28, 126.03, 125.99, 125.85, 125.81, 123.82, 122.48, 121.84, 120.21, 116.90, 112.52, 112.19, 111.08; HR-MS (ESI+) calculated for  $\text{C}_{62}\text{H}_{39}\text{Cl}_2\text{N}_4\text{O}_2$   $[\text{M}+\text{H}]^+$  941.2450, found 941.2445.

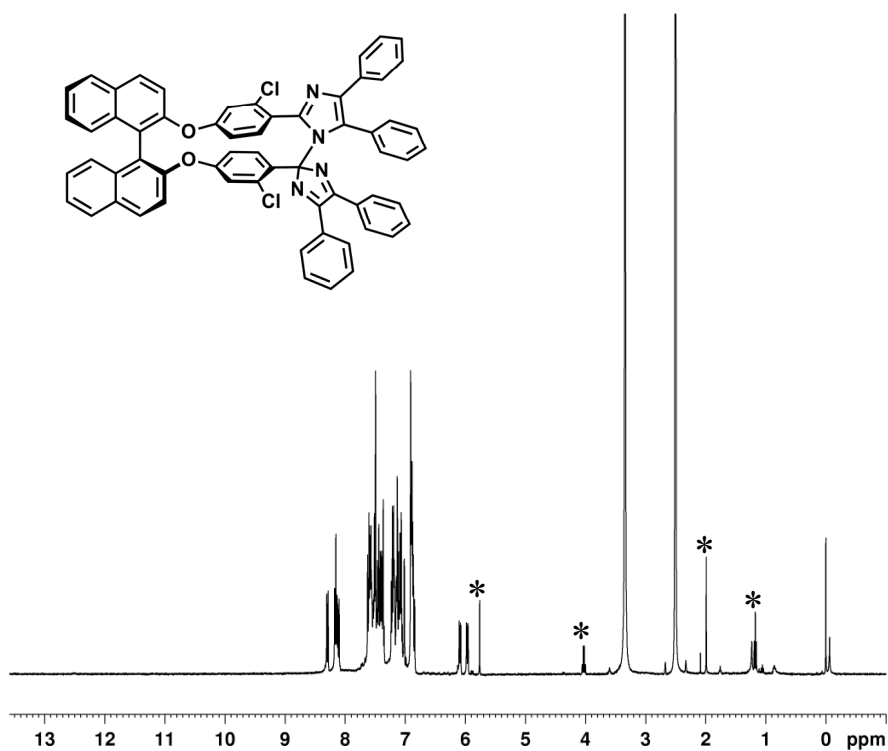

**Figure S19.** <sup>1</sup>H NMR spectrum of (*S*)-**2** in DMSO-*d*<sub>6</sub> (\*Solvent Peaks).

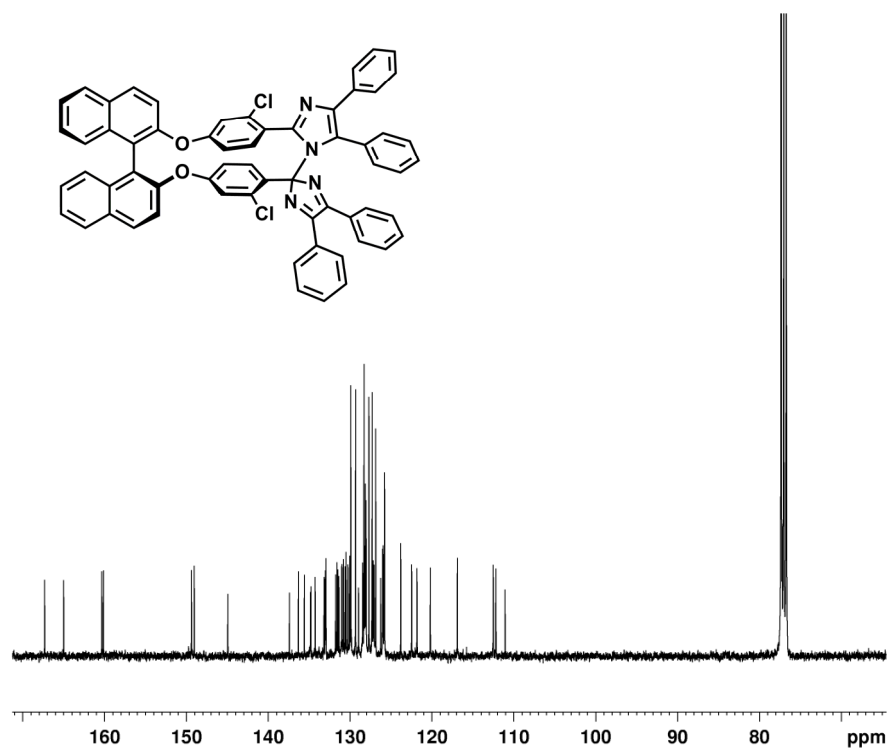

**Figure S20.** <sup>13</sup>C NMR spectrum of (*S*)-**2** in CDCl<sub>3</sub>.



## 2. HR-ESI-TOF-MS-spectra

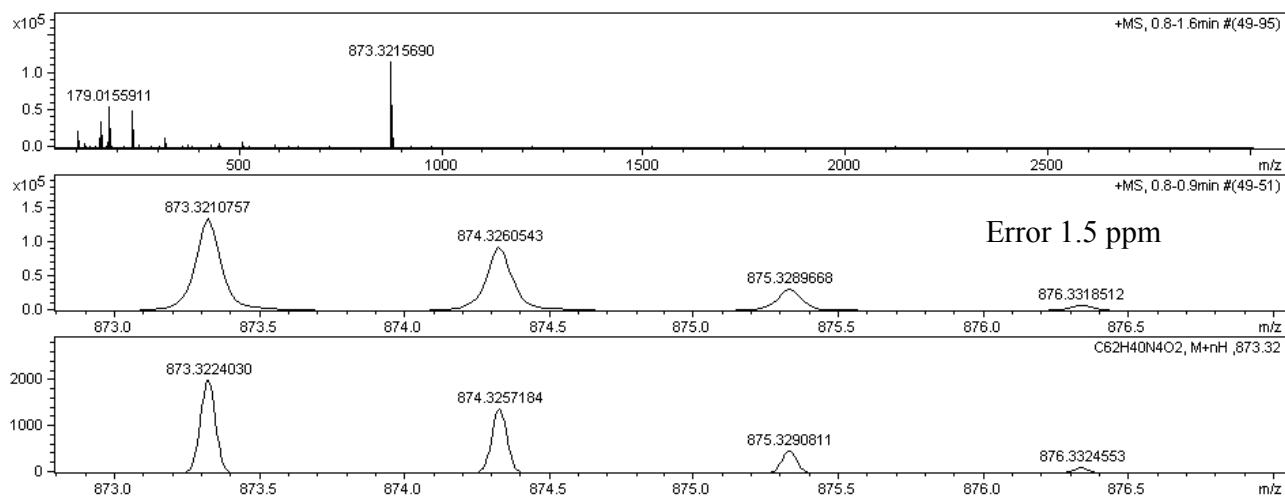

Figure S21. HR-ESI-TOF-MS of 1.

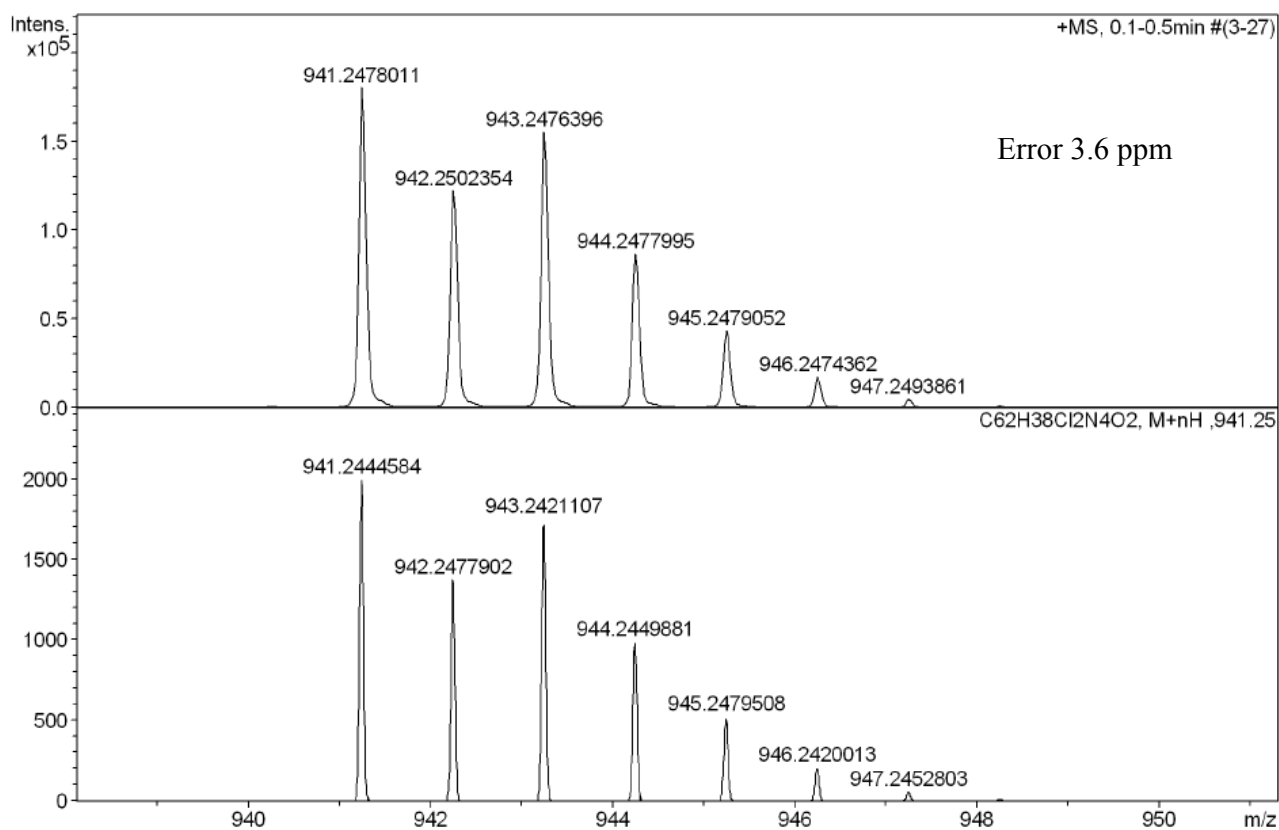

Figure S22. HR-ESI-TOF-MS of 2.

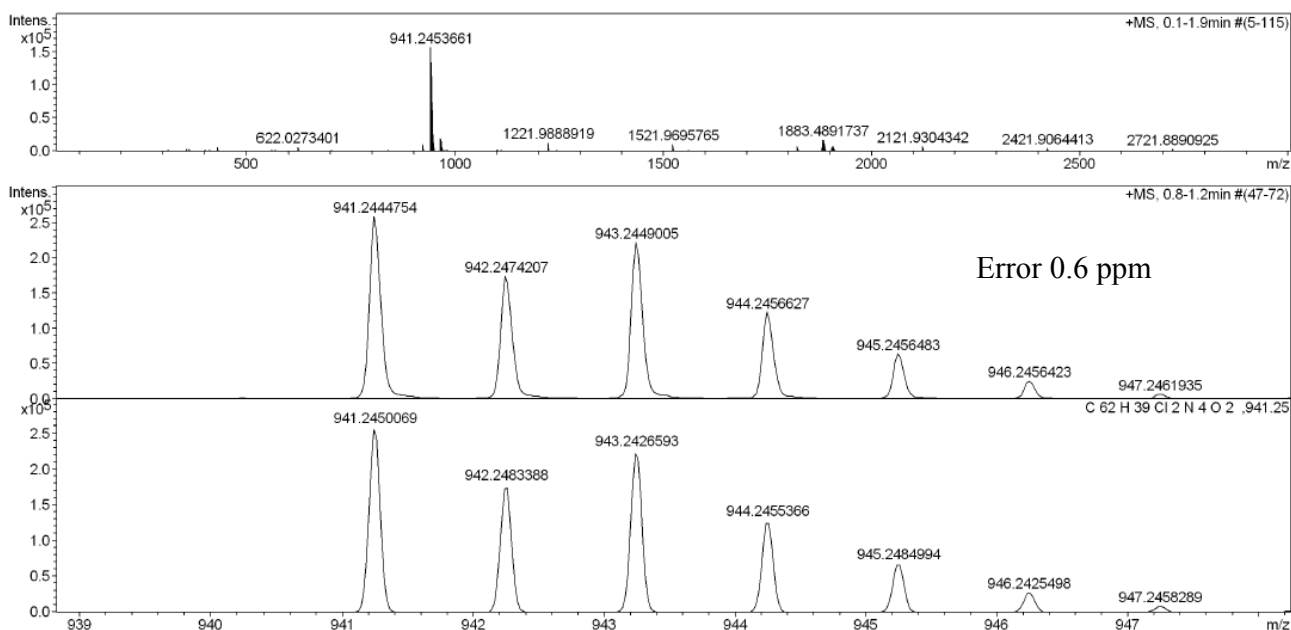

**Figure S23.** HR-ESI-TOF-MS of (S)-2.

### 3. HPLC analyses for determination of purity

HPLC analyses using THF/CH<sub>3</sub>CN = 1/15 as an eluent was performed with system composed of a Mightysil RP18 (4.6 mm × 25 cm) column and JASCO PU-2080 Plus pump equipped with a UV-2075 Plus UV/VIS detector. The mobile phase was THF/CH<sub>3</sub>CN = 1/15 with a flow rate of 1.0 mL/min, inject volume; 2.0 μL.

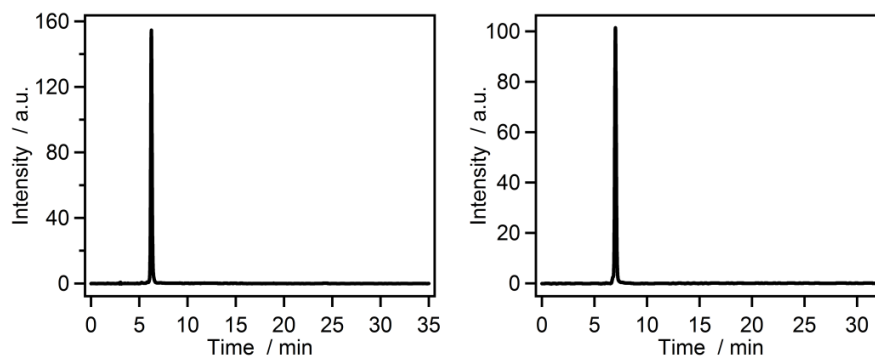

**Figure S24.** HPLC chromatogram of the racemate of **1** (left) and **2** (right), detection wavelength; 254 nm, purity 99%, respectively.

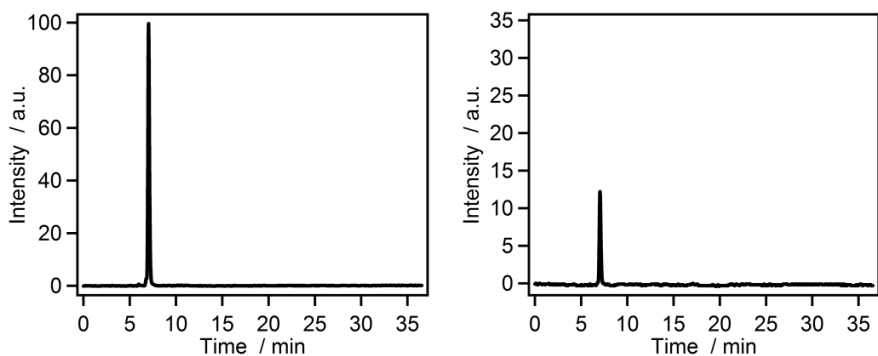

**Figure S25.** HPLC chromatograms of (*R*)-**2**, detection wavelength; 254 (left) and 340 nm (right), purity 99%.

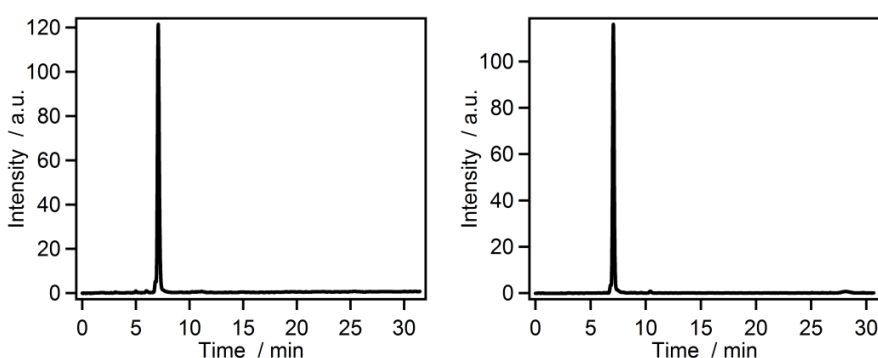

**Figure S26.** HPLC chromatograms of (*S*)-**2**, detection wavelength; 254 (left) and 340 nm (right), purity 99%.

#### 4. Chiral HPLC analyses for determination of enantiomeric excesses (ee)

HPLC analyses using  $\text{CH}_2\text{Cl}_2/\text{hexane} = 1/1$  as an eluent was performed with a system composed of a DAICEL CHIRALPAK IC column (4.6 mm  $\times$  25 cm) and JASCO PU-2080 Plus pump equipped with a UV-2075 Plus UV/VIS detector.

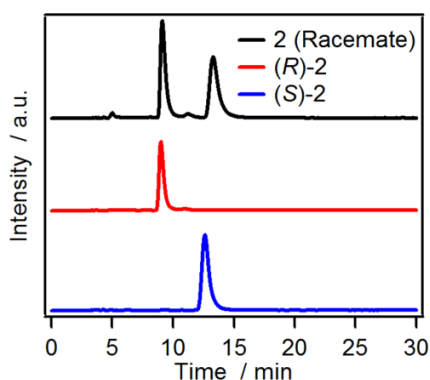

**Figure S27.** HPLC charts of **2**, (*R*)-**2** and (*S*)-**2**.

## 5. X-ray crystallographic analysis

The diffraction data of the single crystal of **1** are collected on the Bruker APEX II CCD area detector ( $\text{MoK}\alpha$ ,  $\lambda = 0.71073$  nm). During the data collection, the lead glass doors of the diffractometer were covered to exclude the room light. The data refinement was carried out by the Bruker APEX II software package with SHELXT program.<sup>S1)</sup> All non-hydrogen atoms were anisotropically refined.

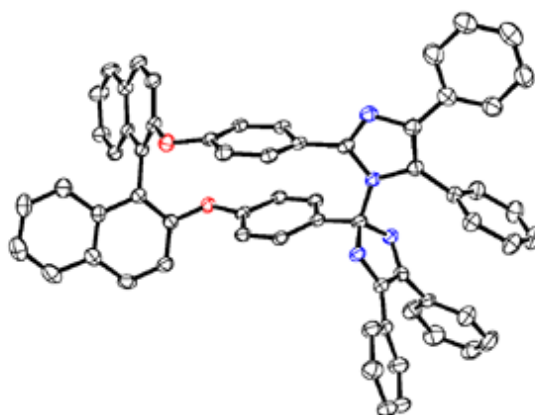

**Figure S28.** ORTEP representation of the molecular structure of **1** with thermal ellipsoid at 50% probability. The hydrogen atoms and solvent molecules are omitted. Oxygen and nitrogen atoms are highlighted in red and blue, respectively.

**Table S1.** X-ray crystallographic data of **1**.

|                                   |                                                                                                                    |
|-----------------------------------|--------------------------------------------------------------------------------------------------------------------|
| Identification code               | 1                                                                                                                  |
| Empirical formula                 | C <sub>62</sub> H <sub>40</sub> N <sub>4</sub> O <sub>2</sub>                                                      |
| Formula weight                    | 872.98                                                                                                             |
| Temperature                       | 90 K                                                                                                               |
| Wavelength                        | 0.71073 Å                                                                                                          |
| Crystal system                    | Triclinic                                                                                                          |
| Space group                       | P-1                                                                                                                |
| Unit cell dimensions              | a = 10.8574(15) Å    α = 90.116(2)°.<br>b = 14.598(2) Å    β = 105.115(2)°.<br>c = 15.654(2) Å    γ = 110.614(2)°. |
| Volume                            | 2229.8(5) Å <sup>3</sup>                                                                                           |
| Z                                 | 2                                                                                                                  |
| Density (calculated)              | 1.300 Mg/m <sup>3</sup>                                                                                            |
| Absorption coefficient            | 0.079 mm <sup>-1</sup>                                                                                             |
| F(000)                            | 912                                                                                                                |
| Crystal size                      | 0.40 x 0.35 x 0.01 mm <sup>3</sup>                                                                                 |
| Theta range for data collection   | 1.50 to 26.40°.                                                                                                    |
| Index ranges                      | -13 ≤ h ≤ 11, -18 ≤ k ≤ 12, -16 ≤ l ≤ 19                                                                           |
| Reflections collected             | 23502                                                                                                              |
| Independent reflections           | 8830 [R(int) = 0.0137]                                                                                             |
| Completeness to theta = 26.40°    | 96.4 %                                                                                                             |
| Absorption correction             | Empirical                                                                                                          |
| Refinement method                 | Full-matrix least-squares on F <sup>2</sup>                                                                        |
| Data / restraints / parameters    | 8830 / 0 / 613                                                                                                     |
| Goodness-of-fit on F <sup>2</sup> | Goodness-of-fit on F <sup>2</sup> 1.023                                                                            |
| Final R indices [I > 2σ(I)]       | R1 = 0.0565, wR2 = 0.1105                                                                                          |
| R indices (all data)              | R indices (all data)    R1 = 0.0791, wR2 = 0.1263                                                                  |
| Largest diff. peak and hole       | 0.519 and -0.267 e.Å <sup>-3</sup>                                                                                 |

## 6. Laser flash photolysis

The laser flash photolysis experiments were performed with a Unisoku TSP-1000 time-resolved spectrophotometer. A 10 Hz Q-switch Nd:YAG laser (Continuum Minilite II) with the third harmonic at 355 nm (ca. 4 mJ per 5 ns pulse) was employed for the excitation light. A halogen lamp (OSRAM HLX64623) was used for a probe light and the transmitted light through the sample was guided into the monochromator and a detector (Unisoku MD200 and Hamamatsu R2949 photomultiplier tube, respectively) with an optical fiber scope.

## 7. Eyring plots

To obtain the activation parameters of the thermal back reactions of **1R** and **2R**, we conducted the temperature dependence of the decay profiles of the thermal back reactions of **1R** and **2R**. The rate constants for the thermal back reaction for **1R** and **2R** are tabulated in **Table S2** and **S3**, respectively. These temperature dependences were analyzed by Eyring plots and these plots are shown in **Figure S28** for **1R** and **Figure S29** for **2R**, respectively.

**Table S2.** First-order rate constants for the thermal back-reaction of **1** in degassed benzene ( $2.1 \times 10^{-5}$  M) at different temperature.

| $T / ^\circ\text{C}$ | $k / \text{s}^{-1}$ |
|----------------------|---------------------|
| 5                    | 4.8                 |
| 10                   | 6.8                 |
| 15                   | 9.5                 |
| 20                   | 13.2                |
| 25                   | 18.2                |
| 30                   | 24.7                |
| 35                   | 33.2                |
| 40                   | 44.3                |

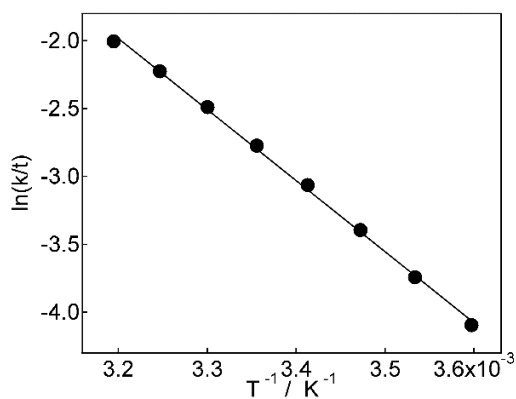

**Figure S29.** The Eyring plot for the thermal back-reaction of colored species of **1** in degassed benzene ( $2.1 \times 10^{-5}$  M).

**Table S3.** First-order rate constants for the thermal back-reaction of **2** in degassed benzene ( $2.3 \times 10^{-5}$  M) at different temperature.

| $T / ^\circ\text{C}$ | $k / \text{s}^{-1}$ |
|----------------------|---------------------|
| 5                    | 3.49                |
| 10                   | 4.19                |
| 15                   | 4.98                |
| 20                   | 5.86                |
| 25                   | 6.68                |
| 30                   | 7.84                |
| 35                   | 9.11                |
| 40                   | 10.2                |

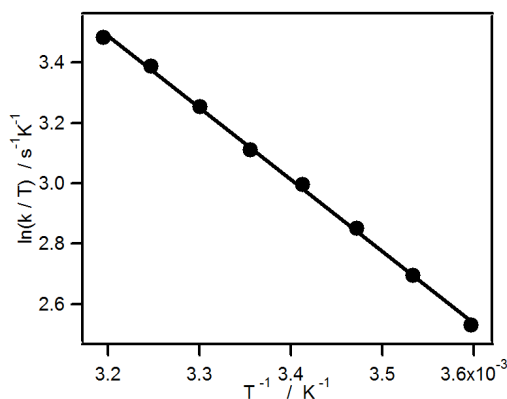

**Figure S30.** The Eyring plot for the thermal back-reaction of colored species of **2** in degassed benzene ( $2.3 \times 10^{-5}$  M).

## 8. CD spectroscopy

Circular dichroism (CD) spectra were recorded on a JASCO J-820 spectropolarimeter. The CD spectra of (*R*)-**2** and (*S*)-**2** in acetonitrile ( $3.3 \times 10^{-5}$  M) were measured with a 10-mm quartz cell at room temperature. Photoracemization processes of (*R*)-**2** and (*S*)-**2** were analyzed using a Q-switch Nd:YAG laser (Continuum Minilite II) with the third harmonic at 355 nm (ca. 4 mJ per 5 ns pulse) as the excitation beam.

## 9. UV-vis absorption spectroscopy and investigation for fatigue resistance

UV-vis absorption spectra were recorded on a Shimadzu UV-3150 spectrometer. The UV-vis absorption spectra of **1** ( $2.1 \times 10^{-5}$  M) and **2** ( $2.3 \times 10^{-5}$  M) in benzene were measured with a 10-mm quartz cell at 25 °C. The fatigue resistances of **1** and **2** were measured using a Q-switch Nd:YAG laser (Continuum Minilite II) with the third harmonic at 355 nm (ca. 4 mJ per 5 ns pulse) as the excitation beam.



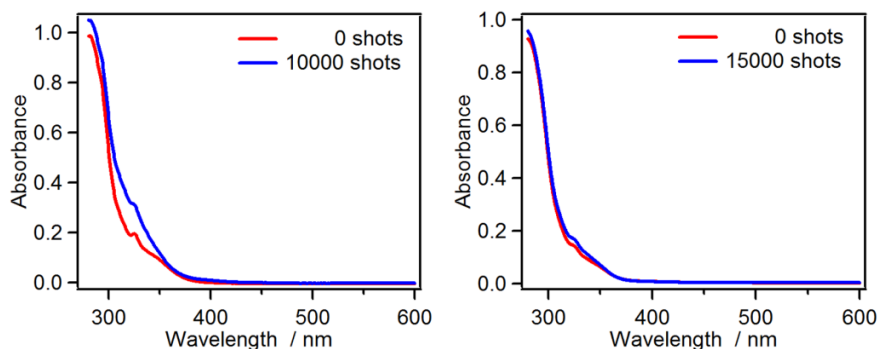

**Figure S31.** UV-vis absorption spectra of **1** ( $2.1 \times 10^{-5}$  M) (left) and **2** ( $2.3 \times 10^{-5}$  M) (right) in benzene before and after laser shots at 25 °C.

## 10. DFT calculations

All calculations were carried out using the Gaussian 09 program (Revision D.01)<sup>S2</sup>. The molecular structures were fully optimized at the M062X/6-31G(d) level of the theory for **2** and the UM062X/6-31G(d) level of the theory for **2R**. The analytical second derivatives were computed using the vibrational analysis to confirm each stationary point to be a minimum. The TDDFT calculations were performed at the MPW1PW91/6-31+G(d) level of the theory for **2** and UMPW1PW91/6-31+G(d) level of the theory for **2R** for the optimized structures.

**Table S4.** Standard orientation of the optimized geometry for **2**.

| Center Number | Atomic Number | Atomic Type | Coordinates (Angstroms) |           |           |
|---------------|---------------|-------------|-------------------------|-----------|-----------|
|               |               |             | X                       | Y         | Z         |
| 1             | 17            | 0           | 0.628470                | 0.813532  | 3.508147  |
| 2             | 17            | 0           | 0.881086                | 0.940766  | -2.989685 |
| 3             | 8             | 0           | -3.989950               | 0.901268  | 1.510275  |
| 4             | 8             | 0           | -3.666619               | -0.634175 | -1.651224 |
| 5             | 7             | 0           | 2.213950                | 1.079457  | -0.008867 |
| 6             | 7             | 0           | 2.089257                | -1.074957 | 0.976874  |
| 7             | 7             | 0           | 2.684124                | -0.891175 | -1.304792 |
| 8             | 7             | 0           | 2.184394                | 3.030688  | 1.068875  |
| 9             | 6             | 0           | -5.525890               | -0.815527 | -0.171582 |
| 10            | 6             | 0           | -4.544712               | -1.415149 | -0.923920 |
| 11            | 6             | 0           | -6.458611               | -1.655593 | 0.524947  |
| 12            | 6             | 0           | -6.345858               | -3.070627 | 0.425199  |

|    |   |   |           |           |           |
|----|---|---|-----------|-----------|-----------|
| 13 | 6 | 0 | -7.270476 | -3.894527 | 1.115345  |
| 14 | 1 | 0 | -7.169807 | -4.973301 | 1.027351  |
| 15 | 6 | 0 | -5.313092 | -3.630124 | -0.373911 |
| 16 | 1 | 0 | -5.239201 | -4.711031 | -0.457411 |
| 17 | 6 | 0 | -7.503153 | -1.115397 | 1.321327  |
| 18 | 1 | 0 | -7.596744 | -0.037684 | 1.408352  |
| 19 | 6 | 0 | -4.432608 | -2.823519 | -1.035804 |
| 20 | 1 | 0 | -3.641311 | -3.231147 | -1.657501 |
| 21 | 6 | 0 | -8.269716 | -3.344184 | 1.875847  |
| 22 | 1 | 0 | -8.973391 | -3.982536 | 2.400777  |
| 23 | 6 | 0 | -8.382989 | -1.938854 | 1.978298  |
| 24 | 1 | 0 | -9.173671 | -1.507214 | 2.584159  |
| 25 | 6 | 0 | -5.699955 | 0.666242  | -0.131175 |
| 26 | 6 | 0 | -6.953086 | 2.677590  | -0.834884 |
| 27 | 6 | 0 | -4.954503 | 1.467457  | 0.700646  |
| 28 | 6 | 0 | -6.156917 | 3.451262  | 0.051992  |
| 29 | 1 | 0 | -6.340310 | 4.519586  | 0.127730  |
| 30 | 6 | 0 | -5.181531 | 2.863073  | 0.804090  |
| 31 | 1 | 0 | -4.565797 | 3.438631  | 1.488322  |
| 32 | 6 | 0 | -6.729795 | 1.275238  | -0.924613 |
| 33 | 6 | 0 | -7.967981 | 3.274632  | -1.624269 |
| 34 | 1 | 0 | -8.125026 | 4.347049  | -1.541920 |
| 35 | 6 | 0 | -8.733880 | 2.518104  | -2.473344 |
| 36 | 1 | 0 | -9.508507 | 2.983955  | -3.074279 |
| 37 | 6 | 0 | -7.539590 | 0.518114  | -1.812874 |
| 38 | 1 | 0 | -7.375977 | -0.551659 | -1.894431 |
| 39 | 6 | 0 | -8.512981 | 1.125109  | -2.566508 |
| 40 | 1 | 0 | -9.119947 | 0.529410  | -3.241253 |
| 41 | 6 | 0 | -1.817698 | 1.029226  | 2.401804  |
| 42 | 1 | 0 | -2.189415 | 0.547039  | 3.298585  |
| 43 | 6 | 0 | -2.699193 | 1.349173  | 1.372425  |
| 44 | 6 | 0 | -0.508519 | -1.167728 | 0.138862  |
| 45 | 1 | 0 | -0.144769 | -1.545581 | 1.087627  |
| 46 | 6 | 0 | -0.459600 | 1.274831  | 2.229684  |

|    |   |   |           |           |           |
|----|---|---|-----------|-----------|-----------|
| 47 | 6 | 0 | -1.856884 | -1.287186 | -0.165052 |
| 48 | 1 | 0 | -2.534681 | -1.744669 | 0.546621  |
| 49 | 6 | 0 | 0.386997  | -0.498970 | -0.695367 |
| 50 | 6 | 0 | -2.248449 | 2.011371  | 0.231813  |
| 51 | 1 | 0 | -2.934845 | 2.270607  | -0.566435 |
| 52 | 6 | 0 | -0.889894 | 2.247652  | 0.092214  |
| 53 | 1 | 0 | -0.517436 | 2.710406  | -0.817650 |
| 54 | 6 | 0 | -0.114286 | 0.008910  | -1.901642 |
| 55 | 6 | 0 | -2.334998 | -0.721108 | -1.343082 |
| 56 | 6 | 0 | -1.456552 | -0.110878 | -2.235989 |
| 57 | 1 | 0 | -1.841364 | 0.327361  | -3.149733 |
| 58 | 6 | 0 | 3.441854  | 2.826584  | 0.551908  |
| 59 | 6 | 0 | 1.480393  | 1.981393  | 0.746143  |
| 60 | 6 | 0 | 2.952513  | -1.973247 | 0.687741  |
| 61 | 6 | 0 | 3.500368  | 1.614788  | -0.101181 |
| 62 | 6 | 0 | 3.337129  | -1.851895 | -0.771031 |
| 63 | 6 | 0 | 1.839939  | -0.326238 | -0.258998 |
| 64 | 6 | 0 | 4.177719  | -4.806693 | 3.626098  |
| 65 | 1 | 0 | 4.480022  | -5.525642 | 4.381570  |
| 66 | 6 | 0 | 3.414584  | -2.957794 | 1.684659  |
| 67 | 6 | 0 | 3.528594  | -2.564131 | 3.021921  |
| 68 | 1 | 0 | 3.305143  | -1.534314 | 3.284056  |
| 69 | 6 | 0 | 3.917374  | -3.485379 | 3.986628  |
| 70 | 1 | 0 | 4.013861  | -3.173995 | 5.021929  |
| 71 | 6 | 0 | 4.047366  | -5.206467 | 2.298504  |
| 72 | 1 | 0 | 4.239159  | -6.237393 | 2.018221  |
| 73 | 6 | 0 | 3.671355  | -4.285081 | 1.326720  |
| 74 | 1 | 0 | 3.568973  | -4.596898 | 0.291386  |
| 75 | 6 | 0 | 4.373751  | -2.575739 | -1.528271 |
| 76 | 6 | 0 | 4.239783  | -2.685870 | -2.917295 |
| 77 | 1 | 0 | 3.338363  | -2.302626 | -3.385716 |
| 78 | 6 | 0 | 5.253408  | -3.260349 | -3.672473 |
| 79 | 1 | 0 | 5.141779  | -3.349201 | -4.748690 |
| 80 | 6 | 0 | 6.559434  | -3.592717 | -1.670007 |

|     |   |   |          |           |           |
|-----|---|---|----------|-----------|-----------|
| 81  | 1 | 0 | 7.470264 | -3.929593 | -1.184722 |
| 82  | 6 | 0 | 6.415789 | -3.713786 | -3.049201 |
| 83  | 1 | 0 | 7.210655 | -4.158864 | -3.640323 |
| 84  | 6 | 0 | 5.541259 | -3.028601 | -0.907700 |
| 85  | 1 | 0 | 5.670858 | -2.905101 | 0.162696  |
| 86  | 6 | 0 | 4.694578 | 0.979481  | -0.705971 |
| 87  | 6 | 0 | 4.832359 | 0.818293  | -2.089119 |
| 88  | 1 | 0 | 4.007256 | 1.096618  | -2.737328 |
| 89  | 6 | 0 | 5.750131 | 0.607097  | 0.130997  |
| 90  | 1 | 0 | 5.646398 | 0.748293  | 1.203401  |
| 91  | 6 | 0 | 6.000287 | 0.282592  | -2.620345 |
| 92  | 1 | 0 | 6.091244 | 0.148421  | -3.694112 |
| 93  | 6 | 0 | 7.051904 | -0.081868 | -1.780080 |
| 94  | 1 | 0 | 7.962449 | -0.500150 | -2.198423 |
| 95  | 6 | 0 | 6.925456 | 0.083580  | -0.404411 |
| 96  | 1 | 0 | 7.740313 | -0.197437 | 0.256352  |
| 97  | 6 | 0 | 4.489511 | 3.848844  | 0.730327  |
| 98  | 6 | 0 | 5.572324 | 3.979237  | -0.148001 |
| 99  | 1 | 0 | 5.658266 | 3.320723  | -1.006037 |
| 100 | 6 | 0 | 4.381960 | 4.741819  | 1.803476  |
| 101 | 1 | 0 | 3.529175 | 4.652397  | 2.468866  |
| 102 | 6 | 0 | 6.532891 | 4.963979  | 0.057998  |
| 103 | 1 | 0 | 7.364015 | 5.052586  | -0.635449 |
| 104 | 6 | 0 | 6.425894 | 5.838868  | 1.135572  |
| 105 | 1 | 0 | 7.176618 | 6.607604  | 1.292459  |
| 106 | 6 | 0 | 5.342929 | 5.726189  | 2.004604  |
| 107 | 1 | 0 | 5.245184 | 6.409538  | 2.843164  |
| 108 | 6 | 0 | 0.036934 | 1.837483  | 1.051461  |

---

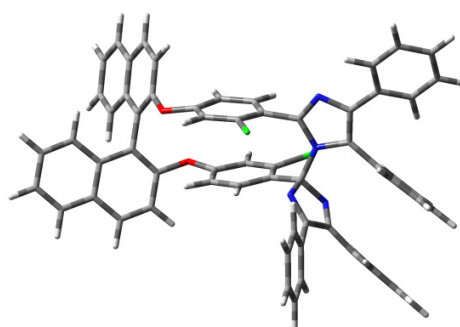

**Figure S32.** Optimized structure of **2**.

|                                             |         |                |                    |
|---------------------------------------------|---------|----------------|--------------------|
| SCF Done: E(RM062X)                         | =       | -3674.20681880 | A.U.               |
| Zero-point correction                       | =       | 0.840173       | (Hartree/Particle) |
| Thermal correction to Energy                | =       | 0.892764       |                    |
| Thermal correction to Enthalpy              | =       | 0.893709       |                    |
| Thermal correction to Gibbs Free Energy     | =       | 0.750066       |                    |
| Sum of electronic and zero-point Energies   | =       | -3673.366645   |                    |
| Sum of electronic and thermal Energies      | =       | -3673.314054   |                    |
| Sum of electronic and thermal Enthalpies    | =       | -3673.313110   |                    |
| Sum of electronic and thermal Free Energies | =       | -3673.456753   |                    |
| Low frequencies ---                         | -8.3944 | -4.4372        | -0.0014            |
|                                             | 0.0002  | 0.0013         | 3.7886             |
| Low frequencies ---                         | 10.5397 | 16.1376        | 16.6243            |

#### The Result for the TDDFT calculation for **2**

Excitation energies and oscillator strengths:

Excited State 1: Singlet-A 2.5889 eV 478.91 nm  $f=0.0048$   $\langle S^{*2} \rangle = 0.000$   
 244 -> 245 0.70233

This state for optimization and/or second-order correction.

Total Energy, E(TD-HF/TD-KS) = -3674.69470866

Copying the excited state density for this state as the 1-particle RhoCI density.

Excited State 2: Singlet-A 3.3013 eV 375.56 nm  $f=0.0468$   $\langle S^{*2} \rangle = 0.000$   
 242 -> 245 0.14252

243 -> 245 0.67263

Excited State 3: Singlet-A 3.5666 eV 347.63 nm f=0.0044 <S\*\*2>=0.000  
 235 -> 245 -0.12277  
 239 -> 245 0.51249  
 240 -> 245 -0.42995

Excited State 4: Singlet-A 3.7223 eV 333.09 nm f=0.0240 <S\*\*2>=0.000  
 237 -> 245 -0.14892  
 242 -> 245 0.66210  
 243 -> 245 -0.13513

Excited State 5: Singlet-A 3.8042 eV 325.92 nm f=0.0151 <S\*\*2>=0.000  
 225 -> 245 0.11349  
 226 -> 245 0.12050  
 232 -> 245 -0.11062  
 235 -> 245 -0.15999  
 236 -> 245 -0.35050  
 238 -> 245 -0.20708  
 239 -> 245 0.26061  
 240 -> 245 0.40069

Excited State 6: Singlet-A 3.8350 eV 323.29 nm f=0.0125 <S\*\*2>=0.000  
 244 -> 246 0.66336  
 244 -> 248 -0.20970

Excited State 7: Singlet-A 3.8541 eV 321.69 nm f=0.0004 <S\*\*2>=0.000  
 241 -> 245 0.68634  
 243 -> 245 0.11487

Excited State 8: Singlet-A 3.8806 eV 319.50 nm f=0.0051 <S\*\*2>=0.000  
 244 -> 246 0.16945  
 244 -> 247 -0.29360  
 244 -> 248 0.60508

Excited State 9: Singlet-A 3.8832 eV 319.29 nm f=0.0213 <S\*\*2>=0.000

235 -> 245 0.12062

236 -> 245 -0.14188

237 -> 245 0.12076

238 -> 245 0.57423

239 -> 245 0.18518

240 -> 245 0.21616

Excited State 10: Singlet-A 3.9538 eV 313.58 nm f=0.0006 <S\*\*2>=0.000

244 -> 246 0.12454

244 -> 247 0.62414

244 -> 248 0.27435

Excited State 11: Singlet-A 3.9781 eV 311.67 nm f=0.0210 <S\*\*2>=0.000

225 -> 245 -0.11472

226 -> 245 -0.14065

230 -> 245 0.12515

232 -> 245 0.16552

235 -> 245 0.37227

237 -> 245 -0.34277

238 -> 245 -0.18746

239 -> 245 0.25014

240 -> 245 0.12987

Excited State 12: Singlet-A 4.0425 eV 306.70 nm f=0.0225 <S\*\*2>=0.000

235 -> 245 -0.16573

236 -> 245 0.52101

237 -> 245 0.26014

239 -> 245 0.22873

240 -> 245 0.25035

Excited State 13: Singlet-A 4.1264 eV 300.46 nm f=0.1130 <S\*\*2>=0.000

237 -> 245 0.17576

|                                                                       |          |
|-----------------------------------------------------------------------|----------|
| 242 -> 246                                                            | -0.13356 |
| 243 -> 246                                                            | 0.60353  |
| Excited State 14: Singlet-A 4.1308 eV 300.15 nm f=0.0094 <S**2>=0.000 |          |
| 229 -> 245                                                            | 0.14237  |
| 230 -> 245                                                            | 0.13298  |
| 233 -> 245                                                            | 0.13891  |
| 235 -> 245                                                            | 0.18596  |
| 236 -> 245                                                            | -0.20204 |
| 237 -> 245                                                            | 0.44354  |
| 238 -> 245                                                            | -0.21610 |
| 242 -> 245                                                            | 0.11484  |
| 243 -> 246                                                            | -0.24144 |
| Excited State 15: Singlet-A 4.1599 eV 298.04 nm f=0.0081 <S**2>=0.000 |          |
| 244 -> 249                                                            | 0.66673  |
| 244 -> 250                                                            | -0.12382 |
| Excited State 16: Singlet-A 4.1931 eV 295.69 nm f=0.0199 <S**2>=0.000 |          |
| 241 -> 246                                                            | 0.11137  |
| 241 -> 247                                                            | 0.15026  |
| 242 -> 246                                                            | -0.15761 |
| 242 -> 247                                                            | -0.10474 |
| 243 -> 247                                                            | 0.59634  |
| Excited State 17: Singlet-A 4.2155 eV 294.11 nm f=0.0540 <S**2>=0.000 |          |
| 242 -> 246                                                            | 0.63773  |
| 243 -> 246                                                            | 0.13329  |
| 243 -> 247                                                            | 0.13092  |
| Excited State 18: Singlet-A 4.2279 eV 293.25 nm f=0.0069 <S**2>=0.000 |          |
| 225 -> 245                                                            | 0.20477  |
| 230 -> 245                                                            | -0.22563 |
| 231 -> 245                                                            | -0.27296 |



232 -> 245 -0.30516  
233 -> 245 0.14562  
235 -> 245 0.38704  
236 -> 245 0.12607

Excited State 19: Singlet-A 4.2689 eV 290.43 nm f=0.0100 <S\*\*2>=0.000

231 -> 245 0.16721  
233 -> 245 0.47534  
235 -> 245 -0.16804  
244 -> 250 -0.16922  
244 -> 252 0.28618  
244 -> 254 -0.19229

Excited State 20: Singlet-A 4.2923 eV 288.85 nm f=0.0167 <S\*\*2>=0.000

233 -> 245 0.17011  
241 -> 246 -0.36241  
241 -> 247 0.21078  
242 -> 247 0.46284  
244 -> 250 0.10439  
244 -> 252 -0.15783

Excited State 21: Singlet-A 4.2954 eV 288.64 nm f=0.1051 <S\*\*2>=0.000

233 -> 245 -0.35871  
241 -> 246 -0.15392  
241 -> 247 0.10232  
242 -> 247 0.19912  
244 -> 250 -0.23783  
244 -> 252 0.37849  
244 -> 254 -0.19980

Excited State 22: Singlet-A 4.3711 eV 283.65 nm f=0.1093 <S\*\*2>=0.000

230 -> 245 -0.21504  
231 -> 245 -0.36046  
232 -> 245 0.51649

233 -> 245      0.10456

Excited State 23:    Singlet-A    4.4003 eV 281.76 nm f=0.0093 <S\*\*2>=0.000

234 -> 246      0.12017

241 -> 246      0.49154

241 -> 247      0.11281

242 -> 247      0.30454

242 -> 250     -0.10596

243 -> 246     -0.10690

243 -> 249      0.18431

Excited State 24:    Singlet-A    4.4082 eV 281.26 nm f=0.0593 <S\*\*2>=0.000

244 -> 250     -0.31449

244 -> 251     -0.32839

244 -> 253     -0.20452

244 -> 254      0.45273

Excited State 25:    Singlet-A    4.4402 eV 279.23 nm f=0.0285 <S\*\*2>=0.000

241 -> 247      0.10037

244 -> 250     -0.17301

244 -> 251      0.60233

244 -> 252      0.11248

244 -> 253     -0.10421

244 -> 254      0.22175

Excited State 26:    Singlet-A    4.4530 eV 278.43 nm f=0.0548 <S\*\*2>=0.000

241 -> 247      0.57477

242 -> 247     -0.25317

243 -> 247     -0.19792

Excited State 27:    Singlet-A    4.4841 eV 276.50 nm f=0.0285 <S\*\*2>=0.000

229 -> 245     -0.31584

230 -> 245      0.29732

231 -> 245     -0.15674

234 -> 245 0.32120  
241 -> 246 0.14392  
243 -> 249 -0.28451

Excited State 28: Singlet-A 4.5133 eV 274.71 nm f=0.0183 <S\*\*2>=0.000

231 -> 245 -0.10182  
234 -> 245 0.39057  
237 -> 246 0.11037  
238 -> 246 -0.10819  
241 -> 247 0.13122  
241 -> 250 0.12652  
242 -> 249 0.14104  
243 -> 249 0.39083

Excited State 29: Singlet-A 4.5335 eV 273.49 nm f=0.0086 <S\*\*2>=0.000

229 -> 245 0.10074  
234 -> 245 -0.15883  
234 -> 247 -0.16648  
237 -> 246 0.22083  
238 -> 246 -0.20912  
241 -> 249 0.12574  
241 -> 250 0.19958  
242 -> 249 0.10848  
242 -> 253 -0.15149  
243 -> 247 0.16228  
243 -> 248 -0.20719  
243 -> 249 -0.15781  
243 -> 250 0.20609

Excited State 30: Singlet-A 4.5380 eV 273.21 nm f=0.0108 <S\*\*2>=0.000

225 -> 245 0.16495  
226 -> 245 0.14985  
228 -> 245 0.34256  
229 -> 245 -0.11803

230 -> 245 0.35940  
232 -> 245 0.13717  
234 -> 245 -0.18873  
243 -> 249 0.27113

Excited State 31: Singlet-A 4.5454 eV 272.77 nm f=0.0080 <S\*\*2>=0.000

244 -> 249 0.14513  
244 -> 250 0.42590  
244 -> 252 0.39834  
244 -> 254 0.22265  
244 -> 256 -0.14996

Excited State 32: Singlet-A 4.5582 eV 272.00 nm f=0.0092 <S\*\*2>=0.000

228 -> 245 0.33747  
229 -> 245 0.37594  
231 -> 245 0.11219  
234 -> 245 0.19728  
234 -> 246 -0.10353  
237 -> 247 0.11409  
242 -> 247 0.10464  
242 -> 250 0.15813  
243 -> 249 -0.12728

Excited State 33: Singlet-A 4.5652 eV 271.59 nm f=0.0360 <S\*\*2>=0.000

228 -> 245 -0.15411  
229 -> 245 -0.16184  
234 -> 245 -0.22600  
234 -> 246 -0.21776  
237 -> 247 0.19334  
238 -> 247 -0.16875  
241 -> 249 0.12012  
241 -> 253 -0.13384  
242 -> 247 0.15328  
242 -> 250 0.28947

243 -> 246 0.11144

Excited State 34: Singlet-A 4.5831 eV 270.53 nm f=0.0186 <S\*\*2>=0.000

227 -> 245 0.11540

242 -> 248 0.11452

243 -> 248 0.59511

Excited State 35: Singlet-A 4.5923 eV 269.98 nm f=0.0205 <S\*\*2>=0.000

222 -> 245 0.16669

225 -> 245 0.13020

226 -> 245 0.23518

227 -> 245 0.39397

228 -> 245 -0.18830

231 -> 245 0.12620

233 -> 245 -0.11781

234 -> 245 0.23883

235 -> 245 0.15303

243 -> 248 -0.14956

Excited State 36: Singlet-A 4.6078 eV 269.07 nm f=0.0094 <S\*\*2>=0.000

244 -> 255 0.16305

244 -> 256 0.39635

244 -> 258 0.44585

244 -> 260 -0.16994

Excited State 37: Singlet-A 4.6679 eV 265.61 nm f=0.0052 <S\*\*2>=0.000

225 -> 245 0.17555

226 -> 245 0.10028

227 -> 245 -0.30212

229 -> 245 -0.30053

230 -> 245 -0.23427

231 -> 245 0.37005

232 -> 245 0.16880

237 -> 245 0.11459

Excited State 38: Singlet-A 4.7331 eV 261.95 nm f=0.0113 <S\*\*2>=0.000

222 -> 245 0.14079  
225 -> 245 -0.30046  
226 -> 245 -0.11572  
227 -> 245 0.17278  
228 -> 245 0.32077  
229 -> 245 -0.21429  
230 -> 245 -0.18313  
233 -> 245 -0.12377  
244 -> 253 0.17922  
244 -> 257 -0.16477

Excited State 39: Singlet-A 4.7387 eV 261.64 nm f=0.1070 <S\*\*2>=0.000

225 -> 245 0.13657  
228 -> 245 -0.14846  
229 -> 245 0.10462  
244 -> 253 0.39082  
244 -> 254 0.15747  
244 -> 256 0.16443  
244 -> 257 -0.38951  
244 -> 258 -0.11781

Excited State 40: Singlet-A 4.7959 eV 258.52 nm f=0.0706 <S\*\*2>=0.000

238 -> 246 0.14386  
239 -> 248 -0.25307  
240 -> 248 0.21679  
243 -> 250 0.25467  
243 -> 252 -0.16128  
244 -> 255 0.36907  
244 -> 256 -0.19873

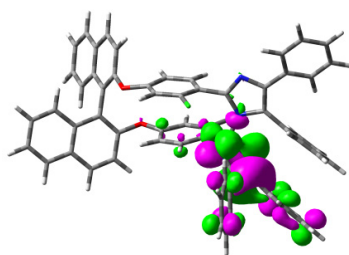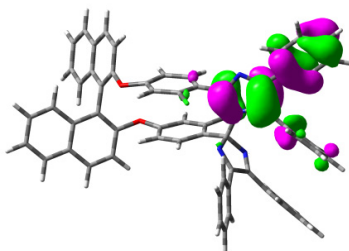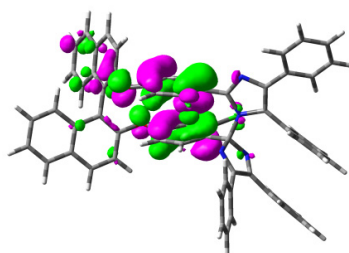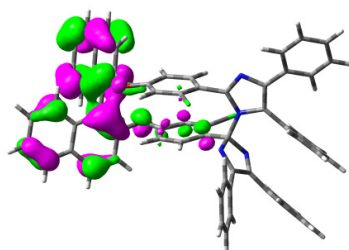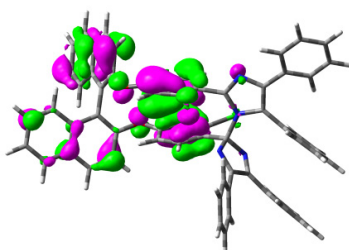

**Figure S33.** The relevant molecular orbitals of **2** calculated at the MPW1PW91/6-31+G(d)//M062X/6-31G(d) level.

**Table S5.** Standard orientation of the optimized geometry for **2R**.

| Center<br>Number | Atomic<br>Number | Atomic<br>Type | Coordinates (Angstroms) |           |           |
|------------------|------------------|----------------|-------------------------|-----------|-----------|
|                  |                  |                | X                       | Y         | Z         |
| 1                | 6                | 0              | -8.743167               | 3.193483  | 1.895170  |
| 2                | 6                | 0              | -8.755948               | 2.689803  | 0.573852  |
| 3                | 6                | 0              | -7.840986               | 1.748362  | 0.174556  |
| 4                | 6                | 0              | -6.860182               | 1.260755  | 1.079212  |
| 5                | 6                | 0              | -6.847352               | 1.770993  | 2.407875  |
| 6                | 6                | 0              | -7.807474               | 2.742130  | 2.789660  |
| 7                | 6                | 0              | -5.886582               | 0.285882  | 0.688180  |
| 8                | 6                | 0              | -4.962302               | -0.128770 | 1.617107  |
| 9                | 6                | 0              | -4.952589               | 0.359802  | 2.945872  |
| 10               | 6                | 0              | -5.874601               | 1.293390  | 3.326429  |
| 11               | 6                | 0              | -5.886129               | -0.285917 | -0.688452 |
| 12               | 6                | 0              | -6.859568               | -1.260673 | -1.080154 |
| 13               | 6                | 0              | -6.845901               | -1.770941 | -2.408786 |
| 14               | 6                | 0              | -5.872500               | -1.293431 | -3.326683 |
| 15               | 6                | 0              | -4.950632               | -0.359954 | -2.945508 |
| 16               | 6                | 0              | -4.961119               | 0.128603  | -1.616736 |
| 17               | 6                | 0              | -7.841030               | -1.748172 | -0.176145 |
| 18               | 6                | 0              | -8.755801               | -2.689549 | -0.576023 |
| 19               | 6                | 0              | -8.742169               | -3.193278 | -1.897320 |
| 20               | 6                | 0              | -7.805839               | -2.742018 | -2.791190 |
| 21               | 8                | 0              | -4.074935               | -1.122685 | 1.258621  |
| 22               | 8                | 0              | -4.073796               | 1.122307  | -1.257599 |
| 23               | 6                | 0              | -2.734458               | -0.928190 | 1.422205  |
| 24               | 6                | 0              | -2.733315               | 0.928014  | -1.421540 |
| 25               | 6                | 0              | -1.952084               | -2.075147 | 1.306873  |
| 26               | 6                | 0              | -0.570154               | -1.981771 | 1.341258  |
| 27               | 6                | 0              | 0.071654                | -0.735610 | 1.511781  |
| 28               | 6                | 0              | -0.757558               | 0.397830  | 1.634500  |
| 29               | 6                | 0              | -2.137689               | 0.322126  | 1.601153  |
| 30               | 6                | 0              | -1.951039               | 2.075063  | -1.306607 |
| 31               | 6                | 0              | -0.569087               | 1.981792  | -1.341151 |



|    |   |   |           |           |           |
|----|---|---|-----------|-----------|-----------|
| 32 | 6 | 0 | 0.072796  | 0.735634  | -1.511295 |
| 33 | 6 | 0 | -0.756357 | -0.397898 | -1.633708 |
| 34 | 6 | 0 | -2.136477 | -0.322292 | -1.600296 |
| 35 | 6 | 0 | 1.505456  | -0.524422 | 1.550151  |
| 36 | 6 | 0 | 1.506582  | 0.524416  | -1.549535 |
| 37 | 7 | 0 | 2.034320  | -0.733048 | -1.428788 |
| 38 | 6 | 0 | 3.338685  | -0.558740 | -1.565339 |
| 39 | 6 | 0 | 3.585592  | 0.890605  | -1.769676 |
| 40 | 7 | 0 | 2.415052  | 1.508612  | -1.767315 |
| 41 | 7 | 0 | 2.413808  | -1.508779 | 1.768392  |
| 42 | 6 | 0 | 3.584296  | -0.890794 | 1.770450  |
| 43 | 6 | 0 | 3.337716  | 0.558460  | 1.565692  |
| 44 | 7 | 0 | 2.033319  | 0.732911  | 1.429110  |
| 45 | 6 | 0 | 4.258945  | 1.696758  | 1.591857  |
| 46 | 6 | 0 | 4.807126  | -1.683175 | 1.907494  |
| 47 | 6 | 0 | 4.808194  | 1.683490  | -1.906647 |
| 48 | 6 | 0 | 4.259425  | -1.697479 | -1.591525 |
| 49 | 6 | 0 | 3.913628  | -2.863264 | -0.890088 |
| 50 | 6 | 0 | 4.765436  | -3.958903 | -0.894217 |
| 51 | 6 | 0 | 5.960588  | -3.918196 | -1.611645 |
| 52 | 6 | 0 | 6.291464  | -2.780291 | -2.344328 |
| 53 | 6 | 0 | 5.445231  | -1.677277 | -2.339837 |
| 54 | 6 | 0 | 6.038276  | 1.280018  | -1.370695 |
| 55 | 6 | 0 | 7.138661  | 2.127777  | -1.409294 |
| 56 | 6 | 0 | 7.032849  | 3.384893  | -1.999621 |
| 57 | 6 | 0 | 5.816407  | 3.792559  | -2.547736 |
| 58 | 6 | 0 | 4.710191  | 2.957048  | -2.491636 |
| 59 | 6 | 0 | 4.711090  | -2.955174 | 2.495954  |
| 60 | 6 | 0 | 5.818044  | -3.789820 | 2.551582  |
| 61 | 6 | 0 | 7.032947  | -3.382718 | 1.999644  |
| 62 | 6 | 0 | 7.136614  | -2.127135 | 1.405608  |
| 63 | 6 | 0 | 6.035501  | -1.280345 | 1.367371  |
| 64 | 6 | 0 | 3.912913  | 2.863388  | 0.891920  |
| 65 | 6 | 0 | 4.765309  | 3.958555  | 0.896046  |

|    |   |   |           |           |           |
|----|---|---|-----------|-----------|-----------|
| 66 | 6 | 0 | 5.961319  | 3.916581  | 1.611969  |
| 67 | 6 | 0 | 6.292457  | 2.777846  | 2.343219  |
| 68 | 6 | 0 | 5.445655  | 1.675288  | 2.338733  |
| 69 | 1 | 0 | -9.473629 | 3.937750  | 2.196506  |
| 70 | 1 | 0 | -9.496138 | 3.054614  | -0.131493 |
| 71 | 1 | 0 | -7.854147 | 1.369650  | -0.842616 |
| 72 | 1 | 0 | -7.784285 | 3.121925  | 3.807814  |
| 73 | 1 | 0 | -4.211053 | -0.023858 | 3.639649  |
| 74 | 1 | 0 | -5.880039 | 1.675811  | 4.343443  |
| 75 | 1 | 0 | -5.877294 | -1.675825 | -4.343711 |
| 76 | 1 | 0 | -4.208628 | 0.023600  | -3.638840 |
| 77 | 1 | 0 | -7.854844 | -1.369430 | 0.841007  |
| 78 | 1 | 0 | -9.496490 | -3.054278 | 0.128841  |
| 79 | 1 | 0 | -9.472473 | -3.937503 | -2.199131 |
| 80 | 1 | 0 | -7.781985 | -3.121855 | -3.809313 |
| 81 | 1 | 0 | -2.437187 | -3.031424 | 1.149885  |
| 82 | 1 | 0 | -0.267546 | 1.360303  | 1.741870  |
| 83 | 1 | 0 | -2.742324 | 1.220467  | 1.661378  |
| 84 | 1 | 0 | -2.436197 | 3.031349  | -1.149850 |
| 85 | 1 | 0 | -0.266278 | -1.360365 | -1.740830 |
| 86 | 1 | 0 | -2.741059 | -1.220689 | -1.660281 |
| 87 | 1 | 0 | 2.989665  | -2.872970 | -0.318249 |
| 88 | 1 | 0 | 4.502691  | -4.843816 | -0.322871 |
| 89 | 1 | 0 | 6.627378  | -4.775356 | -1.606788 |
| 90 | 1 | 0 | 7.205736  | -2.754417 | -2.929304 |
| 91 | 1 | 0 | 5.693426  | -0.803155 | -2.933844 |
| 92 | 1 | 0 | 6.126153  | 0.302327  | -0.913782 |
| 93 | 1 | 0 | 8.078279  | 1.807521  | -0.969485 |
| 94 | 1 | 0 | 7.894367  | 4.045101  | -2.031442 |
| 95 | 1 | 0 | 5.728944  | 4.770984  | -3.010548 |
| 96 | 1 | 0 | 3.748785  | 3.272963  | -2.883116 |
| 97 | 1 | 0 | 3.750766  | -3.270696 | 2.890431  |
| 98 | 1 | 0 | 5.732335  | -4.767150 | 3.017030  |
| 99 | 1 | 0 | 7.894929  | -4.042337 | 2.031153  |

|     |    |   |          |           |           |
|-----|----|---|----------|-----------|-----------|
| 100 | 1  | 0 | 8.074849 | -1.807659 | 0.962278  |
| 101 | 1  | 0 | 6.120767 | -0.304411 | 0.906014  |
| 102 | 1  | 0 | 2.988293 | 2.874095  | 0.321167  |
| 103 | 1  | 0 | 4.502354 | 4.844159  | 0.325865  |
| 104 | 1  | 0 | 6.628551 | 4.773397  | 1.607019  |
| 105 | 1  | 0 | 7.207446 | 2.750906  | 2.927026  |
| 106 | 1  | 0 | 5.694195 | 0.800527  | 2.931604  |
| 107 | 17 | 0 | 0.292817 | 3.470176  | -1.086718 |
| 108 | 17 | 0 | 0.291906 | -3.469887 | 1.086000  |

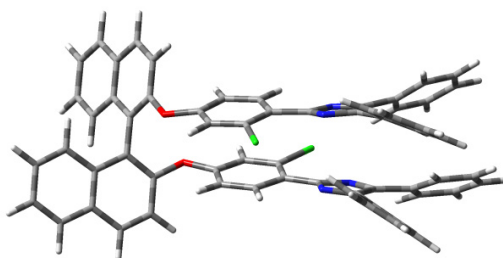

**Figure S34.** Optimized structure of **2R**.

|                                             |         |                |                             |
|---------------------------------------------|---------|----------------|-----------------------------|
| SCF Done: E(UM062X)                         | =       | -3674.18880187 | A.U.                        |
| S**2 before annihilation                    | 0.8370, | after          | 0.1535                      |
| Zero-point correction                       | =       | 0.838224       | (Hartree/Particle)          |
| Thermal correction to Energy                | =       | 0.891260       |                             |
| Thermal correction to Enthalpy              | =       | 0.892204       |                             |
| Thermal correction to Gibbs Free Energy     | =       | 0.750214       |                             |
| Sum of electronic and zero-point Energies   | =       | -3673.350578   |                             |
| Sum of electronic and thermal Energies      | =       | -3673.297542   |                             |
| Sum of electronic and thermal Enthalpies    | =       | -3673.296598   |                             |
| Sum of electronic and thermal Free Energies | =       | -3673.438588   |                             |
| Low frequencies ---                         | -3.3728 | -0.0020        | 0.0007 0.0018 6.1894 7.1811 |
| Low frequencies ---                         | 13.6164 | 18.0737        | 25.5366                     |

The Result for the TDDFT calculation for **2R**

Excitation energies and oscillator strengths:

Excited State 1: 1.732-A 1.0269 eV 1207.42 nm f=0.0024 <S\*\*2>=0.500  
244A -> 245A 0.70505  
244B -> 245B 0.70424

This state for optimization and/or second-order correction.

Total Energy, E(TD-HF/TD-KS) = -3674.73338606

Copying the excited state density for this state as the 1-particle RhoCI density.

Excited State 2: 0.983-A 1.4051 eV 882.41 nm f=0.0534 <S\*\*2>=-0.009  
244A -> 245A -0.70133  
244B -> 245B 0.70213

Excited State 3: 2.596-A 1.8925 eV 655.14 nm f=0.0000 <S\*\*2>=1.434  
239A -> 245A 0.22041  
240A -> 245A 0.62387  
239B -> 245B 0.22133  
240B -> 245B 0.62187

Excited State 4: 2.642-A 1.9760 eV 627.46 nm f=0.0051 <S\*\*2>=1.495  
241A -> 245A 0.32752  
242A -> 245A -0.45441  
243A -> 245A 0.37723  
241B -> 245B -0.32711  
242B -> 245B 0.45496  
243B -> 245B -0.37517

Excited State 5: 2.217-A 2.0193 eV 613.99 nm f=0.0447 <S\*\*2>=0.978  
234A -> 245A 0.11661  
238A -> 245A -0.11651  
239A -> 245A -0.35280  
240A -> 245A -0.52430  
234B -> 245B -0.11681  
238B -> 245B 0.10273  
239B -> 245B 0.35807  
240B -> 245B 0.52625

Excited State 6: 2.128-A 2.1720 eV 570.82 nm  $f=0.2472$   $\langle S^{**2} \rangle=0.883$

|              |          |
|--------------|----------|
| 231A -> 245A | 0.11548  |
| 232A -> 245A | -0.22509 |
| 233A -> 245A | 0.12310  |
| 234A -> 245A | 0.16893  |
| 236A -> 245A | -0.10775 |
| 237A -> 245A | 0.16252  |
| 238A -> 245A | 0.17953  |
| 241A -> 245A | -0.24453 |
| 242A -> 245A | 0.34304  |
| 243A -> 245A | -0.32478 |
| 231B -> 245B | 0.11751  |
| 232B -> 245B | -0.22254 |
| 233B -> 245B | 0.12187  |
| 234B -> 245B | 0.16886  |
| 236B -> 245B | -0.10499 |
| 237B -> 245B | 0.16535  |
| 238B -> 245B | 0.17589  |
| 241B -> 245B | -0.24543 |
| 242B -> 245B | 0.34502  |
| 243B -> 245B | -0.32448 |

Excited State 7: 2.279-A 2.3010 eV 538.82 nm  $f=0.0004$   $\langle S^{**2} \rangle=1.048$

|              |          |
|--------------|----------|
| 228A -> 245A | -0.16440 |
| 229A -> 245A | 0.10852  |
| 231A -> 245A | -0.17570 |
| 232A -> 245A | 0.41800  |
| 233A -> 245A | -0.21821 |
| 234A -> 245A | -0.21958 |
| 235A -> 245A | 0.11595  |
| 236A -> 245A | 0.18744  |
| 237A -> 245A | -0.25095 |
| 238A -> 245A | -0.11061 |

243A -> 245A -0.13175  
228B -> 245B 0.16071  
229B -> 245B -0.10872  
231B -> 245B 0.17832  
232B -> 245B -0.41162  
233B -> 245B 0.21449  
234B -> 245B 0.21820  
235B -> 245B -0.11203  
236B -> 245B -0.18089  
237B -> 245B 0.25311  
238B -> 245B 0.10552  
243B -> 245B 0.12402

Excited State 8: 2.420-A 2.3417 eV 529.46 nm f=0.1591 <S\*\*2>=1.214

228A -> 245A 0.16369  
231A -> 245A 0.10694  
232A -> 245A -0.28802  
233A -> 245A 0.17274  
234A -> 245A 0.17469  
236A -> 245A -0.20756  
237A -> 245A 0.15187  
240A -> 245A 0.12100  
243A -> 245A 0.40972  
228B -> 245B 0.16527  
231B -> 245B 0.11305  
232B -> 245B -0.29394  
233B -> 245B 0.17559  
234B -> 245B 0.17947  
236B -> 245B -0.20795  
237B -> 245B 0.16024  
240B -> 245B 0.12262  
243B -> 245B 0.41023

Excited State 9: 2.558-A 2.3859 eV 519.65 nm f=0.0082 <S\*\*2>=1.386

234A -> 245A -0.10652  
239A -> 245A 0.21324  
241A -> 245A -0.17763  
242A -> 245A 0.45519  
243A -> 245A 0.37767  
243A -> 246A 0.10169  
234B -> 245B -0.10489  
239B -> 245B 0.20080  
241B -> 245B -0.17286  
242B -> 245B 0.44408  
243B -> 245B 0.36367  
243B -> 246B 0.10126

Excited State 10: 2.075-A 2.4020 eV 516.18 nm f=0.0014 <S\*\*2>=0.826

239A -> 245A -0.33735  
240A -> 245A 0.19453  
241A -> 245A 0.14473  
242A -> 245A -0.29291  
243A -> 245A -0.44686  
239B -> 245B 0.34344  
240B -> 245B -0.19480  
241B -> 245B -0.15049  
242B -> 245B 0.30622  
243B -> 245B 0.46147

Excited State 11: 2.136-A 2.4679 eV 502.38 nm f=0.0190 <S\*\*2>=0.891

238A -> 245A -0.18134  
239A -> 245A -0.38678  
240A -> 245A 0.38798  
242A -> 245A 0.20797  
243A -> 245A 0.31065  
238B -> 245B 0.16779  
239B -> 245B 0.39259  
240B -> 245B -0.38848

242B -> 245B -0.20821  
243B -> 245B -0.31084

Excited State 12: 2.079-A 2.5253 eV 490.96 nm f=0.0603 <S\*\*2>=0.830

233A -> 245A 0.10379  
236A -> 245A 0.10212  
238A -> 245A 0.13338  
239A -> 245A 0.55199  
240A -> 245A -0.24334  
242A -> 245A -0.23526  
233B -> 245B 0.10427  
236B -> 245B 0.10032  
238B -> 245B 0.11409  
239B -> 245B 0.55748  
240B -> 245B -0.24429  
242B -> 245B -0.23620

Excited State 13: 2.969-A 2.5445 eV 487.27 nm f=0.0008 <S\*\*2>=1.954

241A -> 245A 0.46096  
241A -> 246A 0.22293  
242A -> 245A 0.31833  
242A -> 246A 0.14996  
242A -> 247A -0.11762  
243A -> 247A -0.22040  
241B -> 245B -0.45855  
241B -> 246B -0.22292  
242B -> 245B -0.31629  
242B -> 246B -0.14992  
242B -> 247B 0.11677  
243B -> 247B 0.22086

Excited State 14: 2.616-A 2.5645 eV 483.46 nm f=0.0052 <S\*\*2>=1.462

235A -> 245A -0.13478  
238A -> 245A -0.31090



|              |          |
|--------------|----------|
| 239A -> 245A | 0.11927  |
| 241A -> 245A | 0.34410  |
| 241A -> 247A | 0.18593  |
| 242A -> 245A | 0.26836  |
| 242A -> 246A | -0.12116 |
| 242A -> 247A | 0.11099  |
| 243A -> 246A | -0.21723 |
| 235B -> 245B | -0.13462 |
| 238B -> 245B | -0.32026 |
| 239B -> 245B | 0.10954  |
| 241B -> 245B | 0.34402  |
| 241B -> 247B | 0.18592  |
| 242B -> 245B | 0.26746  |
| 242B -> 246B | -0.12014 |
| 242B -> 247B | 0.11128  |
| 243B -> 246B | -0.21776 |

Excited State 15: 2.560-A 2.5914 eV 478.45 nm f=0.0023 <S\*\*2>=1.389

|              |          |
|--------------|----------|
| 232A -> 245A | -0.11809 |
| 235A -> 245A | 0.11205  |
| 237A -> 245A | -0.54763 |
| 238A -> 245A | 0.28704  |
| 232B -> 245B | 0.12036  |
| 235B -> 245B | -0.14189 |
| 236B -> 245B | 0.11723  |
| 237B -> 245B | 0.56902  |
| 238B -> 245B | -0.33958 |

Excited State 16: 3.030-A 2.5935 eV 478.07 nm f=0.0053 <S\*\*2>=2.046

|              |          |
|--------------|----------|
| 235A -> 245A | 0.21457  |
| 236A -> 245A | -0.27170 |
| 237A -> 245A | -0.14143 |
| 238A -> 245A | 0.31346  |
| 241A -> 247A | 0.24285  |

242A -> 246A -0.16040  
242A -> 247A 0.14377  
243A -> 245A 0.15904  
243A -> 246A -0.28955  
235B -> 245B 0.19229  
236B -> 245B -0.25864  
238B -> 245B 0.26734  
241B -> 247B 0.24267  
242B -> 246B -0.16049  
242B -> 247B 0.14493  
243B -> 245B 0.15101  
243B -> 246B -0.28945

Excited State 17: 2.146-A 2.6183 eV 473.53 nm f=0.0001 <S\*\*2>=0.901

235A -> 245A 0.15751  
237A -> 245A -0.32983  
238A -> 245A 0.27034  
241A -> 245A 0.43846  
242A -> 245A 0.16462  
243A -> 246A 0.12014  
235B -> 245B 0.15104  
237B -> 245B -0.31352  
238B -> 245B 0.26306  
241B -> 245B 0.43816  
242B -> 245B 0.16469  
243B -> 246B 0.12012

Excited State 18: 2.337-A 2.6583 eV 466.40 nm f=0.0132 <S\*\*2>=1.116

231A -> 245A -0.12404  
232A -> 245A 0.17551  
234A -> 245A -0.18093  
236A -> 245A -0.33440  
237A -> 245A 0.39886  
238A -> 245A 0.13125

|              |          |
|--------------|----------|
| 241A -> 245A | 0.26746  |
| 231B -> 245B | -0.12564 |
| 232B -> 245B | 0.17553  |
| 234B -> 245B | -0.17997 |
| 236B -> 245B | -0.33441 |
| 237B -> 245B | 0.40035  |
| 238B -> 245B | 0.12956  |
| 241B -> 245B | 0.25562  |

Excited State 19: 3.140-A 2.6609 eV 465.96 nm f=0.0010 <S\*\*2>=2.214

|              |          |
|--------------|----------|
| 236A -> 245A | -0.11061 |
| 241A -> 245A | -0.32699 |
| 241A -> 246A | 0.28414  |
| 242A -> 245A | -0.18361 |
| 242A -> 246A | 0.18807  |
| 242A -> 247A | -0.16129 |
| 243A -> 247A | -0.29824 |
| 241B -> 245B | 0.33792  |
| 241B -> 246B | -0.28424 |
| 242B -> 245B | 0.18504  |
| 242B -> 246B | -0.18629 |
| 242B -> 247B | 0.15849  |
| 243B -> 245B | -0.10127 |
| 243B -> 247B | 0.29969  |

Excited State 20: 2.141-A 2.7080 eV 457.85 nm f=0.0022 <S\*\*2>=0.896

|              |          |
|--------------|----------|
| 230A -> 245A | 0.13351  |
| 231A -> 245A | -0.17720 |
| 232A -> 245A | 0.15189  |
| 234A -> 245A | -0.16016 |
| 236A -> 245A | -0.43372 |
| 237A -> 245A | 0.20443  |
| 238A -> 245A | 0.30760  |
| 239A -> 245A | -0.11555 |

|              |          |
|--------------|----------|
| 241A -> 245A | 0.13943  |
| 230B -> 245B | 0.13563  |
| 231B -> 245B | 0.17577  |
| 232B -> 245B | -0.15333 |
| 234B -> 245B | 0.16017  |
| 236B -> 245B | 0.43547  |
| 237B -> 245B | -0.20921 |
| 238B -> 245B | -0.31155 |
| 239B -> 245B | 0.10322  |
| 241B -> 245B | -0.14066 |

Excited State 21: 2.391-A 2.7351 eV 453.30 nm f=0.0017 <S\*\*2>=1.180

|              |          |
|--------------|----------|
| 230A -> 245A | -0.12367 |
| 231A -> 245A | -0.11965 |
| 233A -> 245A | 0.16454  |
| 235A -> 245A | 0.46345  |
| 236A -> 245A | 0.33158  |
| 237A -> 245A | 0.36045  |
| 239A -> 245A | -0.12413 |
| 230B -> 245B | 0.10919  |
| 231B -> 245B | -0.11239 |
| 233B -> 245B | 0.15128  |
| 235B -> 245B | 0.38822  |
| 236B -> 245B | 0.28794  |
| 237B -> 245B | 0.32993  |
| 239B -> 245B | -0.10335 |

Excited State 22: 2.058-A 2.7504 eV 450.78 nm f=0.0002 <S\*\*2>=0.809

|              |          |
|--------------|----------|
| 232A -> 245A | 0.15929  |
| 235A -> 245A | -0.51191 |
| 236A -> 245A | -0.24268 |
| 237A -> 245A | -0.15447 |
| 238A -> 245A | -0.11428 |
| 239A -> 245A | 0.10707  |

229B -> 245B 0.10123  
232B -> 245B -0.17514  
235B -> 245B 0.58130  
236B -> 245B 0.28447  
237B -> 245B 0.19961  
238B -> 245B 0.12397  
239B -> 245B -0.11783

Excited State 23: 2.520-A 2.7576 eV 449.61 nm f=0.0047 <S\*\*2>=1.337

228A -> 245A 0.11671  
232A -> 245A -0.29266  
233A -> 245A -0.19978  
234A -> 245A -0.13311  
235A -> 245A 0.34453  
236A -> 245A -0.21551  
238A -> 245A -0.28220  
243A -> 245A -0.16824  
228B -> 245B 0.11532  
232B -> 245B -0.28989  
233B -> 245B -0.20023  
234B -> 245B -0.13546  
235B -> 245B 0.33751  
236B -> 245B -0.22193  
238B -> 245B -0.28420  
243B -> 245B -0.16913

Excited State 24: 2.265-A 2.7836 eV 445.41 nm f=0.0011 <S\*\*2>=1.033

227A -> 245A -0.13926  
232A -> 245A 0.34339  
233A -> 245A 0.24256  
234A -> 245A 0.24874  
235A -> 245A -0.16548  
236A -> 245A 0.18996  
238A -> 245A 0.30481

243A -> 245A 0.10264  
227B -> 245B 0.13896  
230B -> 245B -0.10271  
232B -> 245B -0.34222  
233B -> 245B -0.24316  
234B -> 245B -0.25031  
235B -> 245B 0.15926  
236B -> 245B -0.19524  
238B -> 245B -0.30736  
243B -> 245B -0.10342

Excited State 25: 2.471-A 2.8877 eV 429.35 nm f=0.0012 <S\*\*2>=1.276

226A -> 245A -0.12941  
229A -> 245A 0.13212  
230A -> 245A -0.12811  
231A -> 245A -0.34770  
232A -> 245A 0.14724  
233A -> 245A 0.36933  
234A -> 245A 0.17879  
236A -> 245A -0.21567  
237A -> 245A -0.10970  
238A -> 245A -0.15350  
226B -> 245B -0.12879  
229B -> 245B 0.13074  
230B -> 245B 0.12543  
231B -> 245B -0.35527  
232B -> 245B 0.14272  
233B -> 245B 0.37355  
234B -> 245B 0.17677  
236B -> 245B -0.21458  
237B -> 245B -0.11034  
238B -> 245B -0.15410

Excited State 26: 2.510-A 2.9147 eV 425.38 nm f=0.0025 <S\*\*2>=1.325

|              |          |
|--------------|----------|
| 227A -> 245A | 0.29624  |
| 229A -> 245A | 0.26108  |
| 231A -> 245A | -0.29894 |
| 233A -> 245A | 0.37794  |
| 234A -> 245A | -0.13741 |
| 235A -> 245A | -0.17013 |
| 227B -> 245B | -0.29645 |
| 229B -> 245B | -0.25615 |
| 231B -> 245B | 0.29736  |
| 233B -> 245B | -0.37045 |
| 234B -> 245B | 0.13862  |
| 235B -> 245B | 0.17365  |

Excited State 27: 2.183-A 2.9445 eV 421.07 nm f=0.0049 <S\*\*2>=0.942

|              |          |
|--------------|----------|
| 225A -> 245A | 0.18045  |
| 226A -> 245A | -0.20958 |
| 227A -> 245A | -0.22526 |
| 229A -> 245A | 0.15300  |
| 230A -> 245A | -0.12028 |
| 231A -> 245A | -0.19095 |
| 233A -> 245A | 0.14726  |
| 234A -> 245A | 0.25235  |
| 235A -> 245A | 0.14537  |
| 236A -> 245A | -0.26492 |
| 238A -> 245A | -0.23904 |
| 239A -> 245A | 0.16013  |
| 225B -> 245B | -0.17724 |
| 226B -> 245B | 0.20825  |
| 227B -> 245B | 0.22253  |
| 229B -> 245B | -0.15077 |
| 230B -> 245B | -0.11967 |
| 231B -> 245B | 0.19847  |
| 233B -> 245B | -0.15040 |
| 234B -> 245B | -0.25119 |

235B -> 245B -0.14139  
236B -> 245B 0.26736  
238B -> 245B 0.24499  
239B -> 245B -0.14867

Excited State 28: 2.370-A 2.9677 eV 417.78 nm f=0.0040 <S\*\*2>=1.154

225A -> 245A -0.23132  
226A -> 245A 0.45724  
227A -> 245A 0.12864  
228A -> 245A 0.19492  
230A -> 245A 0.13481  
232A -> 245A 0.25475  
233A -> 245A 0.18317  
239A -> 245A -0.12111  
225B -> 245B -0.23800  
226B -> 245B 0.47384  
227B -> 245B 0.13309  
228B -> 245B 0.20010  
230B -> 245B -0.13838  
232B -> 245B 0.26444  
233B -> 245B 0.19278  
239B -> 245B -0.12569

Excited State 29: 2.171-A 2.9891 eV 414.78 nm f=0.0010 <S\*\*2>=0.929

225A -> 245A -0.24746  
226A -> 245A 0.36235  
228A -> 245A 0.22397  
229A -> 245A -0.13770  
232A -> 245A 0.27758  
233A -> 245A 0.22724  
235A -> 245A 0.18670  
238A -> 245A -0.17255  
225B -> 245B 0.23572  
226B -> 245B -0.34670



228B -> 245B -0.21539  
229B -> 245B 0.13800  
232B -> 245B -0.27337  
233B -> 245B -0.21994  
234B -> 245B -0.10203  
235B -> 245B -0.18721  
238B -> 245B 0.17071

Excited State 30: 2.394-A 3.0190 eV 410.68 nm f=0.0021 <S\*\*2>=1.183

225A -> 245A 0.11842  
226A -> 245A -0.18308  
227A -> 245A -0.12672  
228A -> 245A 0.16013  
230A -> 245A 0.20417  
231A -> 245A 0.33252  
232A -> 245A 0.30795  
234A -> 245A 0.19133  
235A -> 245A 0.24011  
237A -> 245A 0.10657  
225B -> 245B 0.12329  
226B -> 245B -0.19222  
227B -> 245B -0.12665  
228B -> 245B 0.15802  
230B -> 245B -0.20197  
231B -> 245B 0.32988  
232B -> 245B 0.30948  
234B -> 245B 0.19115  
235B -> 245B 0.24283  
237B -> 245B 0.10350  
238B -> 245B -0.10365

Excited State 31: 2.431-A 3.0865 eV 401.70 nm f=0.0005 <S\*\*2>=1.228

225A -> 245A 0.16963  
226A -> 245A -0.19567

|              |          |
|--------------|----------|
| 229A -> 245A | -0.10539 |
| 230A -> 245A | 0.58915  |
| 236A -> 245A | 0.17374  |
| 225B -> 245B | -0.16794 |
| 226B -> 245B | 0.19702  |
| 229B -> 245B | 0.10204  |
| 230B -> 245B | 0.59066  |
| 236B -> 245B | -0.17615 |

Excited State 32: 2.210-A 3.1132 eV 398.26 nm f=0.0005 <S\*\*2>=0.971

|              |          |
|--------------|----------|
| 225A -> 245A | 0.12892  |
| 226A -> 245A | -0.20119 |
| 227A -> 245A | 0.10065  |
| 228A -> 245A | 0.16132  |
| 230A -> 245A | 0.44906  |
| 231A -> 245A | -0.11935 |
| 233A -> 245A | 0.15288  |
| 234A -> 245A | -0.28231 |
| 236A -> 245A | 0.15281  |
| 225B -> 245B | 0.12845  |
| 226B -> 245B | -0.20279 |
| 227B -> 245B | 0.10691  |
| 228B -> 245B | 0.16151  |
| 230B -> 245B | -0.44425 |
| 231B -> 245B | -0.10977 |
| 233B -> 245B | 0.15606  |
| 234B -> 245B | -0.28457 |
| 236B -> 245B | 0.15154  |

Excited State 33: 2.467-A 3.1355 eV 395.41 nm f=0.0011 <S\*\*2>=1.271

|              |          |
|--------------|----------|
| 225A -> 245A | 0.21886  |
| 226A -> 245A | -0.23978 |
| 227A -> 245A | 0.23972  |
| 228A -> 245A | 0.14561  |

|              |          |
|--------------|----------|
| 230A -> 245A | -0.16684 |
| 231A -> 245A | 0.35698  |
| 232A -> 245A | 0.16643  |
| 233A -> 245A | 0.10676  |
| 234A -> 245A | -0.21779 |
| 235A -> 245A | 0.15003  |
| 225B -> 245B | -0.21421 |
| 226B -> 245B | 0.23648  |
| 227B -> 245B | -0.24013 |
| 228B -> 245B | -0.14142 |
| 230B -> 245B | -0.17639 |
| 231B -> 245B | -0.35208 |
| 232B -> 245B | -0.16893 |
| 233B -> 245B | -0.10668 |
| 234B -> 245B | 0.21309  |
| 235B -> 245B | -0.15057 |

Excited State 34: 2.151-A 3.1837 eV 389.43 nm f=0.0001 <S\*\*2>=0.907

|              |          |
|--------------|----------|
| 226A -> 245A | -0.11310 |
| 227A -> 245A | 0.20159  |
| 228A -> 245A | 0.16802  |
| 230A -> 245A | -0.35801 |
| 231A -> 245A | 0.29316  |
| 233A -> 245A | 0.11342  |
| 234A -> 245A | -0.26159 |
| 244A -> 248A | 0.15301  |
| 226B -> 245B | -0.11372 |
| 227B -> 245B | 0.20500  |
| 228B -> 245B | 0.16844  |
| 230B -> 245B | 0.36510  |
| 231B -> 245B | 0.28635  |
| 233B -> 245B | 0.11637  |
| 234B -> 245B | -0.26144 |
| 244B -> 248B | 0.15297  |

Excited State 35: 2.810-A 3.2121 eV 386.00 nm f=0.0008 <S\*\*2>=1.724

224A -> 245A -0.11010  
230A -> 245A 0.11717  
244A -> 248A 0.52096  
224B -> 245B -0.11034  
230B -> 245B -0.11621  
244B -> 248B 0.52082

Excited State 36: 2.651-A 3.2324 eV 383.56 nm f=0.0024 <S\*\*2>=1.507

227A -> 245A -0.16763  
229A -> 245A -0.25333  
230A -> 245A -0.10972  
231A -> 245A -0.13222  
233A -> 245A 0.14373  
234A -> 245A -0.17488  
238A -> 245A 0.10003  
244A -> 246A -0.16495  
244A -> 249A -0.33986  
244A -> 252A 0.14927  
227B -> 245B 0.16781  
229B -> 245B 0.24147  
230B -> 245B -0.10135  
231B -> 245B 0.12975  
233B -> 245B -0.14134  
234B -> 245B 0.17115  
244B -> 246B 0.16682  
244B -> 249B 0.34282  
244B -> 252B -0.15016

Excited State 37: 2.362-A 3.2459 eV 381.97 nm f=0.0010 <S\*\*2>=1.145

227A -> 245A -0.12655  
228A -> 245A 0.29215  
229A -> 245A 0.49251

|              |          |
|--------------|----------|
| 230A -> 245A | 0.11106  |
| 231A -> 245A | 0.21009  |
| 233A -> 245A | -0.13317 |
| 234A -> 245A | -0.10421 |
| 244A -> 249A | -0.14563 |
| 227B -> 245B | 0.12238  |
| 228B -> 245B | -0.29399 |
| 229B -> 245B | -0.46134 |
| 230B -> 245B | 0.10263  |
| 231B -> 245B | -0.20505 |
| 233B -> 245B | 0.12676  |
| 234B -> 245B | 0.10857  |
| 244B -> 249B | 0.14521  |

Excited State 38: 2.092-A 3.2644 eV 379.81 nm f=0.0179 <S\*\*2>=0.844

|              |          |
|--------------|----------|
| 226A -> 245A | 0.12550  |
| 228A -> 245A | 0.13251  |
| 229A -> 245A | 0.59783  |
| 233A -> 245A | -0.13192 |
| 226B -> 245B | 0.12954  |
| 228B -> 245B | 0.15773  |
| 229B -> 245B | 0.62315  |
| 233B -> 245B | -0.14160 |

Excited State 39: 2.647-A 3.2915 eV 376.68 nm f=0.1839 <S\*\*2>=1.501

|              |          |
|--------------|----------|
| 227A -> 245A | 0.28445  |
| 228A -> 245A | -0.20203 |
| 229A -> 245A | -0.10903 |
| 230A -> 245A | 0.16378  |
| 234A -> 245A | 0.18613  |
| 239A -> 245A | 0.10686  |
| 242A -> 249A | -0.11173 |
| 244A -> 246A | -0.18770 |
| 244A -> 249A | -0.21231 |

|              |          |
|--------------|----------|
| 244A -> 252A | 0.10529  |
| 227B -> 245B | 0.28458  |
| 228B -> 245B | -0.20734 |
| 229B -> 245B | -0.10737 |
| 230B -> 245B | -0.16454 |
| 234B -> 245B | 0.18739  |
| 239B -> 245B | 0.10318  |
| 242B -> 249B | -0.11195 |
| 244B -> 246B | -0.18623 |
| 244B -> 249B | -0.21014 |
| 244B -> 252B | 0.10397  |

Excited State 40: 2.742-A 3.2934 eV 376.46 nm f=0.0354 <S\*\*2>=1.630

|              |          |
|--------------|----------|
| 220A -> 245A | -0.12387 |
| 224A -> 245A | -0.18847 |
| 225A -> 245A | -0.10504 |
| 227A -> 245A | -0.12225 |
| 228A -> 245A | -0.10870 |
| 231A -> 245A | 0.12928  |
| 237A -> 255A | 0.10254  |
| 242A -> 248A | 0.10988  |
| 244A -> 248A | -0.36582 |
| 244A -> 250A | -0.21359 |
| 220B -> 245B | 0.12326  |
| 224B -> 245B | 0.18694  |
| 225B -> 245B | 0.10370  |
| 227B -> 245B | 0.12387  |
| 228B -> 245B | 0.10317  |
| 231B -> 245B | -0.12981 |
| 237B -> 255B | -0.10182 |
| 242B -> 248B | -0.10989 |
| 244B -> 248B | 0.36597  |
| 244B -> 250B | 0.21352  |

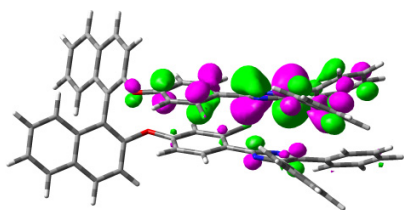

MO245 $\alpha$

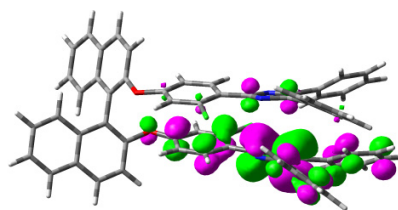

MO245 $\beta$

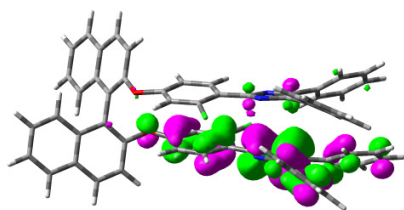

MO244 $\alpha$

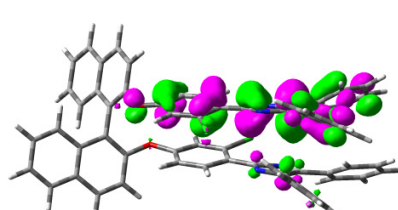

MO244 $\beta$

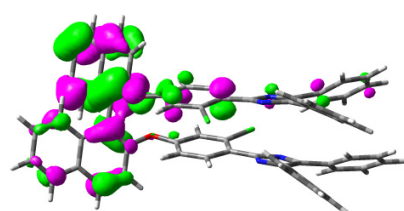

MO243 $\alpha$

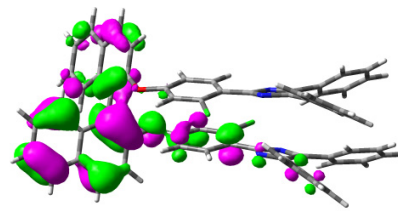

MO243 $\beta$

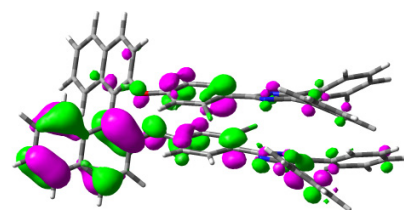

MO242 $\alpha$

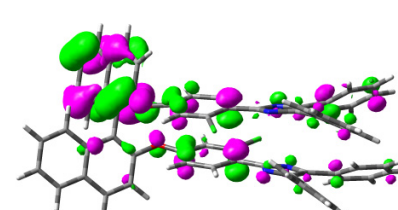

MO242 $\beta$

**Figure S35.** The relevant molecular orbitals of **2R** calculated at the UMPW1PW91/6-31+G(d)//UM062X/6-31G(d) level.

## 11. References

- S1. (1) Sheldrick GM. *SHELXS-97* and *SHELXL-97* 1997; University of Gottingen, Germany. (2) Sheldrick GM. *SADABS* 1996; University of Gottingen, Germany.
- S2. Gaussian 09, Revision D.01, Frisch, M. J.; Trucks, G. W.; Schlegel, H. B.; Scuseria, G. E.; Robb, M. A.; Cheeseman, J. R.; Scalmani, G.; Barone, V.; Mennucci, B.; Petersson, G. A.; Nakatsuji, H.; Caricato, M.; Li, X.; Hratchian, H. P.; Izmaylov, A. F.; Bloino, J.; Zheng, G.; Sonnenberg, J. L.; Hada, M.; Ehara, M.; Toyota, K.; Fukuda, R.; Hasegawa, J.; Ishida, M.; Nakajima, T.; Honda, Y.; Kitao, O.; Nakai, H.; Vreven, T.; Montgomery, J. A., Jr.; Peralta, J. E.; Ogliaro, F.; Bearpark, M.; Heyd, J. J.; Brothers, E.; Kudin, K. N.; Staroverov, V. N.; Kobayashi, R.; Normand, J.; Raghavachari, K.; Rendell, A.; Burant, J. C.; Iyengar, S. S.; Tomasi, J.; Cossi, M.; Rega, N.; Millam, N. J.; Klene, M.; Knox, J. E.; Cross, J. B.; Bakken, V.; Adamo, C.; Jaramillo, J.; Gomperts, R.; Stratmann, R. E.; Yazyev, O.; Austin, A. J.; Cammi, R.; Pomelli, C.; Ochterski, J. W.; Martin, R. L.; Morokuma, K.; Zakrzewski, V. G.; Voth, G. A.; Salvador, P.; Dannenberg, J. J.; Dapprich, S.; Daniels, A. D.; Farkas, Ö.; Foresman, J. B.; Ortiz, J. V.; Cioslowski, J.; Fox, D. J. Gaussian, Inc., Wallingford CT, 2009.
